# Supplementary material for: The incidence and impact of recurrent workplace injury and disease: a cohort study of WorkSafe Victoria, Australia compensation claims
Source: PubMed Central journal article supplement — BMJ Open. 2013 Mar 1;3(3):e002396. doi: 10.1136/bmjopen-2012-002396 (PMC3612748; doi:10.1136/bmjopen-2012-002396), 2013-03-01
Supplement: bmjopen-2012-002396.draft_revisions.pdf [file bmjopen-2012-002396.draft_revisions.pdf]

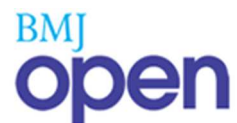

**The incidence and impact of recurrent workplace injury and disease. A cohort study of WorkSafe Victoria, Australia compensation claims**

|                                 |                                                            |
|---------------------------------|------------------------------------------------------------|
| Journal:                        | <i>BMJ Open</i>                                            |
| Manuscript ID:                  | bmjopen-2012-002396                                        |
| Article Type:                   | Research                                                   |
| Date Submitted by the Author:   | 22-Nov-2012                                                |
| Complete List of Authors:       | Ruseckaite, Rasa; ISCRR, Collie, Alex; ISCRR,              |
| <b>Primary Subject Heading</b>: | Public health                                              |
| Secondary Subject Heading:      | Epidemiology, Public health                                |
| Keywords:                       | EPIDEMIOLOGY, PUBLIC HEALTH, STATISTICS & RESEARCH METHODS |
|                                 |                                                            |

SCHOLARONE™  
Manuscripts

Peer review only

1  
2  
3 **The incidence and impact of recurrent workplace injury and disease. A cohort**  
4 **study of WorkSafe Victoria, Australia compensation claims**  
5  
6  
7  
8  
9

10 **Authors:** Rasa Ruseckaite, PhD<sup>1</sup> & Alex Collie, PhD<sup>1,2</sup>.  
11

- 12  
13  
14 1. Institute for Safety, Compensation and Recovery Research, Monash  
15 University, Melbourne, Australia  
16  
17 2. Department of Epidemiology and Preventive Medicine, Monash University,  
18 Melbourne Australia.  
19  
20  
21  
22  
23  
24  
25  
26  
27

28 **Corresponding Author:**  
29

30 Rasa Ruseckaite  
31

32 ISCRR, Level 11, 499 St Kilda Rd  
33

34 Melbourne, VIC 3004 Australia  
35

36 Tel: +61 3 9097 0608  
37

38 Fax: +61 3 9097 0699  
39

40 E-mail: rasa.ruseckaite@monash.edu  
41  
42  
43  
44  
45  
46  
47  
48  
49

50 **Keywords:** Compensation, re-injury; work-related; incidence  
51

52 **Word count:** Abstract (228), Body Text (2,078)  
53  
54  
55  
56  
57  
58  
59  
60

## ABSTRACT

**Objective:** To determine the incidence and impact of recurrent workplace injury and disease over the period 1995 to 2008.

**Design:** Population-based cohort study using data from the state workers' compensation system database.

**Setting:** State of Victoria, Australia.

**Participants:** A total of 448,868 workers with an accepted workers' compensation claim between 1 January 1995 and 31 December 2008 were included into this study. Of them, 135,349 had at least one subsequent claim accepted for a recurrent injury or disease during this period.

**Main outcome measures:** Incidence of initial and recurrent injury and disease claims and time lost from work for initial and recurrent injury and disease.

**Results:** Over the study period 448,868 workers lodged 972,281 claims for discrete occurrences of work-related injury or disease. 53.4% of these claims were for recurrent injury or disease. On average, the rates of initial claims dropped by 5.6%, 95% CI [-5.8, -5.7] per annum, while the rates of recurrent injuries decreased by 4.1%, 95% CI [-4.2, -4.0]. In total, workplace injury and disease resulted in 188,978 years of loss in full time work, with 104,556 of them being for the recurrent injury.

**Conclusions:** Recurrent work-related injury and disease is associated with a substantial social and economic impact. There is an opportunity to reduce the social, health and economic burden of workplace injury by enacting secondary prevention programs targeted at workers who have incurred an initial occupational injury or disease.

## ARTICLE SUMMARY

### Article focus

- To determine the incidence and impact of recurrent workplace injury and disease in Victoria, Australia over the period 1995 to 2008.

### Key messages

- A recurrent workplace injury and disease is frequent and associated with a substantial work disability. We established that over the 14 year study period in the state of Victoria, Australia more than 50 % of claims were filed for a recurrent injury or disease. In addition, we found that the majority (104,556 years) of time lost from work was from the recurrent claims.
- There is an opportunity to reduce the social, health and economic burden of workplace injury by enacting secondary prevention programs targeted at workers who have incurred an initial occupational injury or disease.

### Strengths and limitations of this study

- The principal strength is that this is the first study to summarize the overall impact of work disability and annual trends of subsequent work-related injury and disease, as most of the past studies treated claims as single and discrete events.
- The main weakness of this study is that it is Victoria only specific study, and the database does not cover the entire population, certain injuries maybe underreported and, therefore results published here maybe underrepresented. i.e. workers may not claim for mental health related issues, they possibly have claimed in other institutions in the past or they are self-covered.

## INTRODUCTION

Work is now generally acknowledged as being good for health<sup>1</sup>. There is a growing trend internationally to encourage early return-to-work after injury or illness as a means of facilitating recovery, wellbeing and social inclusion. Conversely, periods of unemployment can lead to poor health or exacerbate existing health issues<sup>1</sup>. Disability arising from workplace injury and illness is also now the subject of substantial public policy and academic interest<sup>2</sup>.

Workers' compensation claims data has been an important source of information to describe the incidence and impact of work-related injury and disease within and across jurisdictions internationally<sup>3-5</sup>. Studies in this area reveal the substantial health and economic costs of workplace injury and illness<sup>6,7</sup>. For example, the total cost of health care of officially recognized injured workers in Mexico in 2005 was \$753,420,222 USD<sup>8</sup>. Similarly, workers' compensation insurance for US workers in 2007 cost \$85 billion USD<sup>9</sup>. Over the past two decades the concept of 'work disability', usually measured as the number of days lost from work, has emerged as a means of estimating the burden of workplace injury and disease<sup>2</sup>.

More recently, we and others have utilised workers' compensation system data to focus on recurrent workplace injury or disease<sup>10-12</sup>. These studies in discrete populations or over discrete time periods have demonstrated that injury and disease recurrences contribute substantially to the overall burden of workplace injury and disease. There are numerous examples of population based estimates of the overall burden of workplace injury and disease, including detailed epidemiological analysis of time series<sup>13-15</sup>. However, these studies do not differentiate between initial and

1  
2  
3 recurrent episodes of injury or disease. Examining annual trends of the initial and  
4  
5 recurrent occupational injury may provide us a better understanding of the relative  
6  
7 effectiveness of primary and secondary prevention initiatives<sup>16 17</sup>.  
8  
9

10 The current study sought to determine the incidence and impact of a recurrent  
11  
12 workplace injury and disease in the state of Victoria, Australia over a 14 year period  
13  
14 using the data from the state workers' compensation system. This study has two  
15  
16 aims: 1) to describe the annual incidence of initial and recurrent workplace injury and  
17  
18 disease, and 2) to summarize the disability associated with initial and recurrent  
19  
20 workplace injury and disease.  
21  
22

## 23 **METHODS**

### 24 **Setting**

25  
26  
27  
28  
29 Victoria is a state of approximately 5.5 million people with an approximate full-  
30  
31 time working population of 2.4 million (year 2010 data obtained from  
32  
33 www.abs.gov.au). The Victorian WorkCover Authority (VWA) is the state government  
34  
35 occupational health and safety and workers' compensation authority. To be eligible  
36  
37 for workers' compensation benefits, the worker must be able to demonstrate a  
38  
39 causal link between the injury or disease and their work. Employers are responsible  
40  
41 for income replacement for the first 10 days away from work, beyond which the VWA  
42  
43 provides income replacement benefits. Reasonable healthcare and rehabilitation  
44  
45 benefits are also provided by the VWA. 85% to 90% of workers in the state have  
46  
47 their workers' compensation insurance provided by the VWA. Exceptions are federal  
48  
49 government employees, sole traders and employees of some large self-insured  
50  
51 employers.  
52  
53  
54

### 55 **Compensation database**

1  
2  
3 A de-identified workers' compensation administrative database for the period  
4 from 1986 was obtained from the VWA for the purpose of this study. The database  
5 contains information regarding the claimant, injury or disease, and benefits paid in  
6 relation to the claim. A detailed description of the compensation database can be  
7 found elsewhere<sup>11</sup>.  
8  
9  
10  
11  
12

### 13 **Data analysis**

14  
15  
16  
17 All accepted workers' compensation claims occurring between 1 January  
18 1995 and 31 December 2008 were included in this study. Descriptive statistics were  
19 used to provide an overview of initial (first claim of a worker) and recurrent (second  
20 or subsequent claim of a worker) claims by gender, nature of affliction (injury or  
21 disease) and type of benefits paid (income replacement and medical expenses). Two  
22 outcomes were considered in this study: the rates of initial and recurrent injury and  
23 disease over the 14 year period; and the number of compensated days away from  
24 work, which was used as the indicator of 'work disability'<sup>18</sup>.  
25  
26  
27  
28  
29  
30  
31  
32  
33  
34

35 The incidence of initial and recurrent claims per annum was calculated as a  
36 rate per 1,000 workers, for males and females. Denominator data was drawn from  
37 the Australian Bureau of Statistics (ABS) labour force survey for the state of Victoria.  
38 Poisson count regression was used to determine annual changes in rates between  
39 initial and recurrent injury and disease. SPSS version 20.0 was used for all analyses.  
40  
41  
42  
43  
44  
45  
46

## 47 **RESULTS**

### 48 **Initial and recurrent workplace injury and disease**

49  
50 Over the study period of 14 years a total of 448,868 workers lodged  
51 compensation claims for 972,281 discrete occurrences of work-related injury or  
52  
53  
54  
55  
56  
57  
58  
59  
60

disease (Table 1). Recurrent injury and disease accounted for 53.4% of all claims. These were attributable to only 26.2% of all claimants.

Males were more likely to have a recurrent injury or disease than females. A majority of claims were for occupational injuries. Occupational diseases were more likely to result in subsequent workers' compensation claims (24.2% vs. 28.2%). The majority of claims were lodged for income replacement and/or medical expenses.

[Insert Table 1 here]

### **Incidence of initial and recurrent workplace injury and disease**

The rates of initial and recurrent workplace injury and disease per 1,000 working population are displayed in Figure 1. Figure 1A illustrates incidence per annum of initial and recurrent claims per 1,000 working population. The rates of initial injury reduced from 26.4/1,000 in 1995 to 12.7/1,000 in 2008 (or by 5.6% per annum,  $p < 0.0001$ , 95% CIs -5.8 to -5.7). The rates of recurrent injury decreased from 24.9/1,000 in 1995 to 14.5/1,000 in 2008 (or by 4.1% per annum,  $p < 0.0001$ , 95% CIs -4.2 to -4.0).

Figure 1B illustrates annual incidence rates per 1,000 working population of initial and recurrent injury and disease, in males and females separately. The rates of initial injury and disease in males were lower by 6.5% ( $p < 0.0001$ , 95% CIs -6.7 to -6.2) than in females. Similarly, the rates of the recurrent injury and disease in males were also lower than if females, but by 4.5%, ( $p < 0.0001$ , 95% CIs -4.8 to -4.2). The incidence rates of recurrent injuries and diseases were higher than in the initial claims by 6.5% ( $p < 0.0001$ , 95% CIs 6.3 to 6.5) in males, and by 4.2%, ( $p < 0.0001$ , 95% CIs 3.9 to 4.5) in females.



[Insert Figure 1 here]

## Work disability

Table 2 summarizes work disability associated with the initial and recurrent injury and disease. In total, over the study period of 14 years, workplace injury and disease resulted in 188,978 years of full-time work loss. More than half (55.3%) of this burden was caused by recurrent injury and disease.

Males incurred for 45,570 (38.7%) years of full time work loss due to the initial injury, and 72,211 (61.3%) years - due to the recurrent injury and disease. Females incurred 38,130 (54.8%) years of full time work loss during their initial claims. This amount of time decreased to 31,404 (45.2%) years in recurrent injury and disease. Occupational injuries accounted for 53,713 (44.8%) years of work disability in all initial claims and 66,026 (55.2%) in recurrent injury. Work disability incurred for a recurrent disease, relatively to the initial claims, was similar: 38,530 (55.6%) and 30,709 (44.4%) years of full time work loss respectively. The average duration of time lost due to workplace injury and disease was 89.8 (267.6) days; however it was higher for recurrent claims.

[Insert Table 2 here]

## DISCUSSION

### Principal findings

This large-scale administrative data study, designed to provide a population-based overview of workers' compensation claims, showed that a recurrent workplace injury and disease is frequent and associated with a substantial work disability. We established that over the 14 year study period, 448,868 workers in the state of

1  
2  
3 Victoria, Australia, lodged 972,281 compensation claims, 53.4 % of them were filed  
4  
5 for a recurrent injury or disease (Table 1). In agreement with the previously reported  
6  
7 findings we observed that rates of work-related injury and disease were declining,  
8  
9 which is probably associated with legislative changes, unemployment rates or  
10  
11 seasonal affects, and, most importantly, with better strategies and increased  
12  
13 effectiveness of injury prevention<sup>14 15 19 20</sup>. In addition, we found that the majority  
14  
15 (104,556 years) of time lost from work was from the recurrent claims (Table 2). This  
16  
17 is equivalent to ~10.4 days for each working person in Victoria. Despite that  
18  
19 sickness absence as a proportion of working time is decreasing, these figures are  
20  
21 still substantial and represent a significant cost to the economy<sup>21</sup>.  
22  
23  
24  
25

### 26 **Strengths and weaknesses of the study**

27  
28 The first strength of this study is the large and exclusive compensation  
29  
30 research data source, containing detailed and objective information on workers, their  
31  
32 injuries and diseases. Entries of the dataset are unique and no duplicate information  
33  
34 is recorded. The second and principal strength is that, to our knowledge, this is the  
35  
36 first study to summarize the overall impact of work disability and annual trends of  
37  
38 subsequent work-related injury and disease, as most of the past studies treated  
39  
40 claims as single and discrete events<sup>14 15 22-24</sup>. Earlier published scientific papers  
41  
42 focused on the first return-to-work and time lost on temporary disability benefits as  
43  
44 outcomes of the workplace related injury. These studies concluded that work-related  
45  
46 injury and illness affects not only injured workers, but also employers, society and  
47  
48 government<sup>7 22 25-30</sup>. Alternatively, only a few recent studies emphasized the burden  
49  
50 of subsequent workers' compensation claims; however these studies analysed only  
51  
52 the initial and second claims, but did not consider any further work-related injuries or  
53  
54  
55  
56  
57  
58  
59  
60

1  
2  
3 illnesses<sup>10-12 31</sup>. Lack of understanding of the overall impact of a recurrent workplace  
4  
5 injury and disease instigates a significant dilemma associated with employment rates  
6  
7 and earnings of injured workers, adverse effects on productivity and costs, including  
8  
9 those associated with compensation<sup>9 26 32</sup>.

10  
11  
12 The main weakness of this study is that it is Victoria only specific study, and  
13  
14 the database does not cover the entire population, certain injuries maybe  
15  
16 underreported and, therefore results published here maybe underrepresented. i.e.  
17  
18 workers may not claim for mental health related issues, they possibly have claimed  
19  
20 in other institutions in the past or they are self-covered<sup>33 34</sup>. In addition, legislative  
21  
22 changes and organizational policies might have affected claim rates reported here<sup>35</sup>.  
23  
24 It is also important to acknowledge that the present study does not report trends in  
25  
26 claim costs or cost effectiveness analysis over the years; however it is already  
27  
28 known that repeat workers' compensation claims are associated with increased  
29  
30 costs of medical and like services and weekly compensation paid<sup>11</sup>.

### 31 32 33 34 35 36 37 38 **Conclusions and policy implications**

39  
40 The most effective strategy for preventing work-related disability is a primary  
41  
42 prevention approach, that is, preventing the initial work related injury and disease<sup>36</sup>.  
43  
44 Findings of the current study highlight a steady decline in the number of initial work-  
45  
46 related injury and disease (Figure 1), indicating that primary injury prevention  
47  
48 strategies at workplace are becoming more and more efficient over the years<sup>14</sup>. An  
49  
50 accelerating reduction of recurrent injuries and diseases suggests that secondary  
51  
52 prevention initiatives were possibly reviewed and addressed more carefully after  
53  
54 1999. Despite the current return-to-work efforts and decreasing rates of the initial  
55  
56  
57  
58  
59  
60

1  
2  
3 and recurrent injury and disease, there is probably still more room for improvement.  
4  
5 Current injury prevention policies and procedures need to be regularly revised,  
6  
7 focussing on more efficient secondary prevention<sup>37-39</sup>. A key to a successful  
8  
9 secondary prevention is not only appropriately trained staff, but also clearly identified  
10  
11 risk factors at workplace and a combination of early predictors for poor long-term  
12  
13 outcomes in workers<sup>16 17</sup>. Both the injured worker and their employer are known to  
14  
15 the compensation authorities, and therefore can be targeted by OH&S regulators  
16  
17 and policy makers. It is essential to consider other factors such as precarious  
18  
19 working conditions, worker's age, gender and comorbidities<sup>40-42</sup>.  
20  
21  
22

23  
24 Return-to-work coordinators, clinicians and care management support also  
25  
26 play an important role in workers' return-to-work and re-injury prevention. Their  
27  
28 efforts may need to be revisited with incentives provided so reduced costs for  
29  
30 workers' compensation healthcare and increased safety practises are  
31  
32 implemented<sup>32</sup>. Education of workers to be more aware of hazards associated with  
33  
34 their job may be an important step forward. Introducing work wellness and  
35  
36 rehabilitation programs, providing counselling and job training for returning-to-work  
37  
38 staff members may also assist in a further reduction of re-injury<sup>2 32 43 44</sup>.  
39  
40  
41  
42

43  
44 **Acknowledgements** The authors thank Susan Tinsley and Catherine Smith for their  
45  
46 support during the development of this paper.  
47

48  
49 **Contributors** Both authors equally participated in the study design and coordination.  
50  
51 Both authors read and approved the final manuscript.  
52

53  
54 **Funding** This research and Dr Collie's involvement in the study was provided by a  
55  
56 research grant from WorkSafe Victoria.  
57  
58  
59  
60

1  
2  
3 **Competing interests** None.  
4

5 **Ethics approval** Monash University Human Research Ethics Committee,  
6 Melbourne, Australia.  
7

8  
9 **Provenance and peer review** Not commissioned; externally peer reviewed.  
10

11 **Data Sharing:** Workers compensation data used in this study are collected by the WorkSafe  
12 Victoria and held by the ISCRR who regularly respond to data requests from the public.  
13  
14  
15  
16  
17  
18  
19  
20  
21  
22  
23  
24  
25  
26  
27  
28  
29  
30  
31  
32  
33  
34  
35  
36  
37  
38  
39  
40  
41  
42  
43  
44  
45  
46  
47  
48  
49  
50  
51  
52  
53  
54  
55  
56  
57  
58  
59  
60

For peer review only

## REFERENCES

1. Wadell G, Burton A. Is work good for your health and well-being? *Department for Work and Pensions* 2006.
2. Pransky G, Loisel P, Anema J. Work disability prevention research: current and future prospects. *J Occup Rehabil* 2011;21:287-292.
3. Anema J, Schellart A, Cassidy J *et al*. Can cross country differences in return-to-work after chronic occupational back pain be explained? An explanatory analysis on disability policies in a six country cohort study. *J Occup Rehabil* 2009;19:419-426.
4. Campolieti M. Multiple state hazard models and workers' compensation claims: an examination of workers compensation data from Ontario. *Acc Anal Prev* 2000;33:197-202.
5. Garcy P, Mayer T, Gatchel R. Recurrent or new injury outcomes after return to work in chronic disabling spinal disorders: tertiary prevention efficacy and functional restoration treatment. *Spine* 1996;21:952-959.
6. Shuford H, Restrepo T, Beaven B *et al*. Trends in components of medical spending within workers compensation: results from 37 states combined. *J Occup Environ Med* 2009;51.
7. Smith P, Chen C, Hogg-Johnson S *et al*. Trends in the health care use in expenditures associated with no-lost-time claims in Ontario: 1991 to 2006. *JOEM* 2011;53:211-217.
8. Carlos-Rivera F, Aguilar-Madrid G, Gómez-Montenegro P *et al*. Estimation of health-care costs for work-related injuries in the Mexican Institute of Social Security. *Am J Ind Med* 2009;52:195-201.
9. Utterback D, Schnorr T, Silverstein B *et al*. Occupational health and safety surveillance and research using workers' compensation data. *JOEM* 2012;00:1-5.
10. Cherry N, Sithole F, Beach J *et al*. Second WCB claims: who is at risk? *Can J Public Health* 2010;101.
11. Ruseckaite R, Collie A. Repeat workers' compensation claims: risk factors, costs and work disability. *BMC Public Health* 2011;11:492.
12. Bena A, Mamo C, Marinacci C *et al*. Risk of repeat accidents by economic activity in Italy. *Safety Sc* 2006;44:297-312.
13. Yassi A, Gilbert M, Cvitkovich Y. Trends in injuries, illnesses, and policies in Canadian healthcare workplaces. *Can J Public Health* 2005;96:333-339.

14. Breslin F, Smith P, Moore I. Examining the decline in lost-time claim rates across age groups in Ontario between 1991 and 2007. *Occup Environ Med* 2011;68:813-817.
15. Moore I, Tompa E. Understanding changes over time in workers' compensation claim rates using time series analytical techniques *Occup Environ Med* 2011;68:837-841.
16. Arocena P, Nunez P, Villanueva M. The impact of prevention measures and organizational factors on occupational injuries. *Safety Science* 2008;46:1369-1384.
17. Guzman J, Yassi A, Baril R *et al*. Decreasing occupational injury and disability: the convergence of systems theory, knowledge transfer and action research. *Work* 2008;30:229-239.
18. Berecki-Gisolf J, Clay F, Collie A *et al*. Predictors of sustained return to work after work-related injury or disease: insights from workers' compensation claims records. *J Occup Rehabil* 2011;22:283-291.
19. Gatty C, Turner M, Buitendorp D *et al*. The effectiveness of back pain and injury prevention programs in the workplace *Work* 2003;20:275-266.
20. Foley M, Fan Z, Rauser E *et al*. The impact of regulatory enforcement and consultation visits on workers' compensation claims incidence rates and costs, 1999-2008. *Am J Ind Med* 2012;55:976-990.
21. Black C. *Working for a healthier tomorrow*, London 2008.
22. Berecki-Gisolf J, Clay F, Collie A *et al*. The impact of ageing on work disability and return to work: insights from workers' compensation claim records *JOEM* 2012;54:318-327.
23. Johnson D, Fry T. *Factors affecting return to work after injury: a study for the Victorian WorkCover authority Melbourne Institute Working Paper No. 28/02* 2002.
24. Smith P, Hogg-Johnson S, Mustard C *et al*. Comparing the risk factors associated with serious versus and less serious work-related injuries in Ontario between 1991 and 2006. *Am J Ind Med* 2012;55:84-92.
25. Boden L, Biddle E, Spieler E. Social and economic impacts of workplace illness and injury: current and future directions for research. *Am J Ind Med* 2001;40:398-342.
26. Boden L, Galizz M. Economic consequences of workplace injuries and illnesses: lost earnings and benefit adequacy. *Am J Ind Med* 1999;36:487-503.
27. John F, Kerr M, Brooker A *et al*. Disability resulting from occupational low back pain: part II: what do we know about secondary prevention? A review of

- 1  
2  
3 the scientific evidence on prevention after disability begins. *Spine*  
4 1996;21:2918-2929.  
5  
6 28. Leigh J, Markowitz S, Fahs M *et al*. Occupational illness and injury in the  
7 United States: estimates of costs, morbidity, and mortality. *Arch Intern Med*  
8 1997;157:1557-1568.  
9  
10 29. Miller T, Galbraith M. The costs of occupational injury in the United States.  
11 *Accid Anal & Prevention* 1995;27:741-747.  
12  
13 30. Reville R, Bhattacharya J, Sager L. Measuring the economic consequences of  
14 workplace injuries. *Am J Ind Med* 2001;40:452-463  
15  
16 31. Wasiaak R, Pransky G, Webster B. Methodological challenges in studying  
17 recurrence of low back pain. *J Occup Rehabil* 2003;13:21-31.  
18  
19 32. Wickizer T, Franklin G, Fulton-Kehoe D *et al*. Improving quality, preventing  
20 disability and reducing costs in workers' compensation healthcare. *Med Care*  
21 2011;49:1105-1111.  
22  
23 33. Collie A, Pan Y, Britt H *et al*. Coverage of work-related injuries by workers'  
24 compensation in Australian general practice. *Int J Work Comp* 2011;3:1-10.  
25  
26 34. Driscoll T, Mitchell R, Mandryk J *et al*. Coverage of work related fatalities in  
27 Australia by compensation and occupational health and safety agencies.  
28 *Occup Environ Med* 2003;60:195-200.  
29  
30 35. Cameron I, Rebbeck T, Sindhusake D. Legislative change is associated with  
31 improved health status in people with whiplash. *Soine* 2008;33:250-254.  
32  
33 36. Feldstein A, Breen V, Dana N. Prevention of work-related disability. *J Prev*  
34 *Med* 1998;14:33-39.  
35  
36 37. American Public Health Association. *Worker's compensation reform* 2009.  
37  
38 38. Ammendolia C, Cassidy D, Soklaridis S *et al*. Designing a workplace return-  
39 to-work program for occupational low back pain: an intervention mapping  
40 approach. *BMC Musculoskeletal Disorders* 2009;10:doi:10.1186/1471-2474-  
41 10-65.  
42  
43 39. Sullivan M, Ward L, Tripp D *et al*. Secondary prevention of work disability:  
44 community-based psychosocial intervention for musculoskeletal disorders. *J*  
45 *Occup Rehabil* 2005;15:377-392.  
46  
47 40. Quinlan M, Mayhew C. Precarious employment and workers' compensation.  
48 *Int J Law Psych* 1999;22:491-520.  
49  
50 41. Restrepo T, Shuford H. *Workers compensation and the aging workforce*. In:  
51 Brief NR (ed.) 2011.  
52  
53  
54  
55  
56  
57  
58  
59  
60



- 1  
2  
3 42. Smith C, Silverstein B, Bonauto D *et al*. Temporary workers in Washington  
4 state. *Am J Indust Med* 2010;53:135-145.  
5  
6 43. Sullivan M, Feuerstein M, Gatchel R *et al*. Integrating psychosocial and  
7 behaviuoral interventions to achieve optimal rehabilitation outcomes. *J Occup*  
8 *Rehabil* 2005;15:475-489.  
9  
10 44. Feuerstein M. A multidisciplinary approach to the prevention, evaluation, and  
11 management of work disability. *J Occup Rehabil* 1991;1:5-12.  
12  
13  
14  
15  
16  
17  
18  
19  
20  
21  
22  
23  
24  
25  
26  
27  
28  
29  
30  
31  
32  
33  
34  
35  
36  
37  
38  
39  
40  
41  
42  
43  
44  
45  
46  
47  
48  
49  
50  
51  
52  
53  
54  
55  
56  
57  
58  
59  
60

For peer review only

Table 1. Profile of initial and recurrent workers' compensation claims by category in Victoria, 1995 to 2008.

| Category                                       | Initial claims |       |       | Recurrent claims |       |       | Total claims |       |       | p     |       |
|------------------------------------------------|----------------|-------|-------|------------------|-------|-------|--------------|-------|-------|-------|-------|
|                                                | N              | Row % | Col % | N                | Row % | Col % | N            | Row % | Col % | Row   | Col   |
| <b>Total claims</b>                            | 448,868        | 46.2  | -     | 523,413          | 53.4  | -     | 972,281      | 100   | -     | 0.000 | -     |
| <b>Total claimants</b>                         | 448,868        | 76.8  | -     | 135,349          | 26.2  | -     | 584,217      | 100   | -     | 0.000 | -     |
| <b>Claims per claimant</b>                     | 1              | -     | -     | 3.86             | -     | -     | 1.66         | -     | -     | -     | -     |
| <b>Gender</b>                                  |                |       |       |                  |       |       |              |       |       |       |       |
| <b>Males</b>                                   | 274,915        | 75.1  | 61.2  | 91,072           | 24.9  | 67.3  | 365,987      | 100   | 62.6  | 0.000 | 0.000 |
| <b>Females</b>                                 | 163,059        | 79.8  | 36.3  | 41,111           | 20.2  | 30.4  | 204,170      | 100   | 34.9  | 0.000 | 0.000 |
| <b>Missing</b>                                 | 10,894         | 77.5  | 2.4   | 3,166            | 22.5  | 2.3   | 14,060       | 100   | 2.5   | 0.003 | NS    |
| <b>Nature of affliction</b>                    |                |       |       |                  |       |       |              |       |       |       |       |
| <b>Injury</b>                                  | 340,203        | 47.4  | 75.8  | 376,033          | 52.6  | 71.8  | 716,236      | 100   | 73.6  | 0.000 | 0.000 |
| <b>Disease</b>                                 | 108,665        | 42.4  | 24.2  | 147,380          | 57.6  | 28.2  | 256,045      | 100   | 26.4  | 0.000 | 0.000 |
| <b>Compensation benefits paid</b>              |                |       |       |                  |       |       |              |       |       |       |       |
| <b>Income replacement +/- medical expenses</b> | 257,082        | 46.8  | 57.3  | 292,340          | 53.2  | 55.8  | 549,422      | 100   | 56.5  | 0.000 | 0.000 |
| <b>Medical expenses only</b>                   | 191,786        | 45.4  | 42.7  | 231,073          | 54.6  | 44.2  | 422,859      | 100   | 43.5  | 0.000 | 0.000 |

Table 2. Work disability arising from initial and recurrent workers compensation claims in Victoria, 1995 to 2008.

| Category                             | Initial claims   |       |       | Recurrent claims |       |       | Total claims     |       |       | p     |       |
|--------------------------------------|------------------|-------|-------|------------------|-------|-------|------------------|-------|-------|-------|-------|
|                                      | N                | Row % | Col % | N                | Row % | Col % | N                | Row % | Col % | Row   | Col   |
| <b>Work- loss, years</b>             |                  |       |       |                  |       |       |                  |       |       |       |       |
| <b>All time-loss claims</b>          | 84,422           | 44.7  | -     | 104,556          | 55.3  | -     | 188,978          | 100   | -     | 0.000 | -     |
| <b>Males</b>                         | 45,570           | 38.7  | 53.4  | 72,211           | 61.3  | 69.1  | 117,781          | 100   | 62.3  | 0.000 | 0.000 |
| <b>Females</b>                       | 38,130           | 54.8  | 45.2  | 31,404           | 45.2  | 30.1  | 69,534           | 100   | 36.8  | 0.000 | 0.000 |
| <b>Injury</b>                        | 53,713           | 44.8  | 63.6  | 66,026           | 55.2  | 63.1  | 119,739          | 100   | 63.4  | 0.000 | 0.000 |
| <b>Disease</b>                       | 30,709           | 44.4  | 36.4  | 38,530           | 55.6  | 36.9  | 69,239           | 100   | 36.6  | 0.000 | NS    |
| <b>Average (SD) work- loss, days</b> |                  |       |       |                  |       |       |                  |       |       |       |       |
| <b>All time-loss claims</b>          | 85.6<br>(257.1)  | -     | -     | 93.4<br>(276.5)  | -     | -     | 89.8<br>(267.6)  | -     | -     | 0.000 |       |
| <b>Males</b>                         | 76.2<br>(241.3)  | -     | -     | 86.4<br>(267.2)  | -     | -     | 82.2<br>(256.7)  | -     | -     | 0.000 |       |
| <b>Females</b>                       | 102.9<br>(284.2) | -     | -     | 118.5<br>(309.6) | -     | -     | 109.4<br>(295.1) | -     | -     | 0.000 |       |
| <b>Injury</b>                        | 71.1<br>(293.0)  | -     | -     | 86.1<br>(275.9)  | -     | -     | 80.7<br>(261.2)  | -     | -     | 0.000 |       |
| <b>Disease</b>                       | 113.9<br>(286.5) | -     | -     | 109.3<br>(277.1) | -     | -     | 111.3<br>(281.3) | -     | -     | 0.000 |       |

1  
2  
3  
4  
5  
6  
7  
8  
9  
10  
11  
12  
13  
14  
15  
16  
17  
18  
19  
20  
21  
22  
23  
24  
25  
26  
27  
28  
29  
30  
31  
32  
33  
34  
35  
36  
37  
38  
39  
40  
41  
42  
43  
44  
45  
46  
47  
48  
49

For peer review only

Figure 1. Incidence of initial (1A) and recurrent (1B) workplace injury and disease per 1,000 workers in Victoria, 1995 to 2008

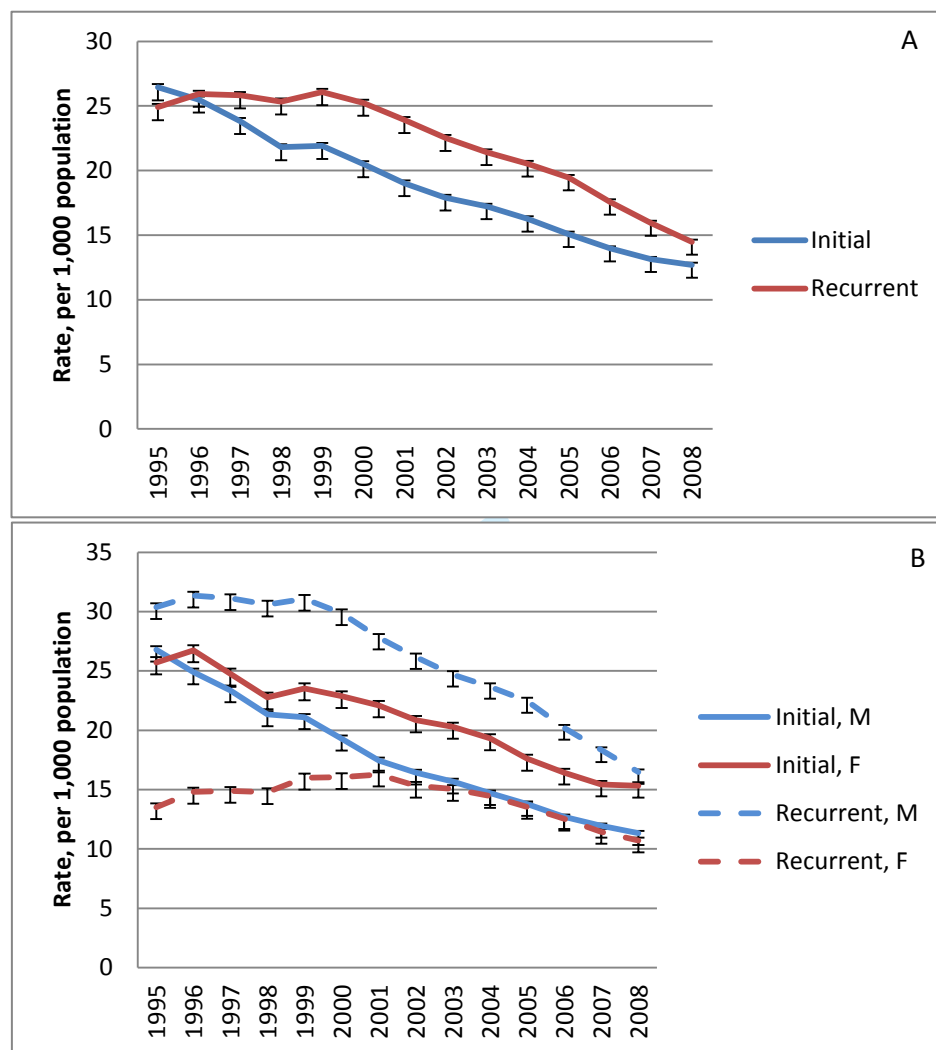



**The incidence and impact of recurrent workplace injury and disease. A cohort study of WorkSafe Victoria, Australia compensation claims**

|                                 |                                                            |
|---------------------------------|------------------------------------------------------------|
| Journal:                        | <i>BMJ Open</i>                                            |
| Manuscript ID:                  | bmjopen-2012-002396.R1                                     |
| Article Type:                   | Research                                                   |
| Date Submitted by the Author:   | 06-Feb-2013                                                |
| Complete List of Authors:       | Ruseckaite, Rasa; ISCRR, Collie, Alex; ISCRR,              |
| <b>Primary Subject Heading</b>: | Public health                                              |
| Secondary Subject Heading:      | Epidemiology, Public health                                |
| Keywords:                       | EPIDEMIOLOGY, PUBLIC HEALTH, STATISTICS & RESEARCH METHODS |
|                                 |                                                            |

SCHOLARONE™  
Manuscripts

Peer review only

1  
2  
3 **The incidence and impact of recurrent workplace injury and disease. A cohort**  
4 **study of WorkSafe Victoria, Australia compensation claims**  
5  
6  
7  
8  
9

10 **Authors:** Rasa Ruseckaite, PhD<sup>1</sup> & Alex Collie, PhD<sup>1,2</sup>.  
11

- 12  
13  
14 1. Institute for Safety, Compensation and Recovery Research, Monash  
15 University, Melbourne, Australia  
16  
17 2. Department of Epidemiology and Preventive Medicine, Monash University,  
18 Melbourne Australia.  
19  
20  
21  
22  
23  
24  
25  
26  
27

28 **Corresponding Author:**  
29

30 Rasa Ruseckaite  
31

32 ISCRR, Level 11, 499 St Kilda Rd  
33

34 Melbourne, VIC 3004 Australia  
35

36 Tel: +61 3 9097 0608  
37

38 Fax: +61 3 9097 0699  
39

40 E-mail: rasa.ruseckaite@monash.edu  
41  
42  
43  
44  
45  
46  
47  
48  
49

50 **Keywords:** Compensation, re-injury; work-related; incidence  
51

52 **Word count:** Abstract (228), Body Text (2,484)  
53  
54  
55  
56  
57  
58  
59  
60

## ABSTRACT

**Objective:** To determine the incidence and impact of recurrent workplace injury and disease over the period 1995 to 2008.

**Design:** Population-based cohort study using data from the state workers' compensation system database.

**Setting:** State of Victoria, Australia.

**Participants:** A total of 448,868 workers with an accepted workers' compensation claim between 1 January 1995 and 31 December 2008 were included into this study. Of them, 135,349 had at least one subsequent claim accepted for a recurrent injury or disease during this period.

**Main outcome measures:** Incidence of initial and recurrent injury and disease claims and time lost from work for initial and recurrent injury and disease.

**Results:** Over the study period 448,868 workers lodged 972,281 claims for discrete occurrences of work-related injury or disease. 53.4% of these claims were for recurrent injury or disease. On average, the rates of initial claims dropped by 5.6%, 95% CI [-5.8, -5.7] per annum, while the rates of recurrent injuries decreased by 4.1%, 95% CI [-4.2, -4.0]. In total, workplace injury and disease resulted in 188,978 years of loss in full time work, with 104,556 of them being for the recurrent injury.

**Conclusions:** Recurrent work-related injury and disease is associated with a substantial social and economic impact. There is an opportunity to reduce the social, health and economic burden of workplace injury by enacting secondary prevention programs targeted at workers who have incurred an initial occupational injury or disease.



## ARTICLE SUMMARY

### Article focus

- To determine the incidence and impact of recurrent workplace injury and disease in Victoria, Australia over the period 1995 to 2008.

### Key messages

- A recurrent workplace injury and disease is frequent and associated with a substantial work disability. We established that over the 14 year study period in the state of Victoria, Australia more than 50 % of claims were filed for a recurrent injury or disease. In addition, we found that the majority (104,556 years) of time lost from work was from the recurrent claims.
- There is an opportunity to reduce the social, health and economic burden of workplace injury by enacting secondary prevention programs targeted at workers who have incurred an initial occupational injury or disease.

### Strengths and limitations of this study

- The principal strength is that this is the first study to summarize the overall impact of work disability and annual trends of subsequent work-related injury and disease, as most of the past studies treated claims as single and discrete events.
- The main weakness of this study is that it is Victoria only specific study, and the database does not cover the entire population, certain injuries maybe underreported and, therefore results published here maybe underrepresented. i.e. workers may not claim for mental health related issues, they possibly have claimed in other institutions in the past or they are self-covered.

## INTRODUCTION

Work is now generally acknowledged as being good for health<sup>1</sup>. There is a growing trend internationally to encourage early return-to-work after injury or illness as a means of facilitating recovery, wellbeing and social inclusion. Conversely, periods of unemployment can lead to poor health or exacerbate existing health issues<sup>1</sup>. Disability arising from workplace injury and illness is also now the subject of substantial public policy and academic interest<sup>2</sup>.

Workers' compensation claims data has been an important source of information to describe the incidence and impact of work-related injury and disease within and across jurisdictions internationally<sup>3-5</sup>. Studies in this area reveal the substantial health and economic costs of workplace injury and illness<sup>6,7</sup>. For example, the total cost of health care of officially recognized injured workers in Mexico in 2005 was \$753,420,222 USD<sup>8</sup>. Similarly, workers' compensation insurance for US workers in 2007 cost \$85 billion USD<sup>9</sup>. Over the past two decades the concept of 'work disability', usually measured as the number of days lost from work, has emerged as a means of estimating the burden of workplace injury and disease<sup>2</sup>.

More recently, we and others have utilised workers' compensation system data to focus on recurrent workplace injury or disease<sup>10-12</sup>. These studies in discrete populations or over discrete time periods have demonstrated that injury and disease recurrences contribute substantially to the overall burden of workplace injury and disease. There are numerous examples of population based estimates of the overall burden of workplace injury and disease, including detailed epidemiological analysis of time series<sup>13-15</sup>. However, these studies do not differentiate between initial and

1  
2  
3 recurrent episodes of injury or disease. Examining annual trends of the initial and  
4  
5 recurrent occupational injury may provide us a better understanding of the relative  
6  
7 effectiveness of primary and secondary prevention initiatives<sup>16 17</sup>.  
8  
9

10 The current study sought to determine the incidence and impact of a recurrent  
11  
12 workplace injury and disease in the state of Victoria, Australia over a 14 year period  
13  
14 using the data from the state workers' compensation system. This study has two  
15  
16 aims: 1) to describe the annual incidence of initial and recurrent workplace injury and  
17  
18 disease, and 2) to summarize the disability associated with initial and recurrent  
19  
20 workplace injury and disease.  
21  
22

## 23 24 **METHODS**

### 25 26 **Setting**

27  
28 Victoria is a state of approximately 5.5 million people with an approximate full-  
29  
30 time working population of 2.4 million (year 2010 data obtained from  
31  
32 www.abs.gov.au). The Victorian WorkCover Authority (VWA) is the state government  
33  
34 occupational health and safety and workers' compensation authority. To be eligible  
35  
36 for workers' compensation benefits, the worker must be able to demonstrate a  
37  
38 causal link between the injury or disease and their work. Employers are responsible  
39  
40 for income replacement for the first 10 days away from work, beyond which the VWA  
41  
42 provides income replacement benefits. Reasonable healthcare and rehabilitation  
43  
44 benefits are also provided by the VWA. 85% to 90% of workers in the state have  
45  
46 their workers' compensation insurance provided by the VWA. Exceptions are federal  
47  
48 government employees, sole traders and employees of some large self-insured  
49  
50 employers.  
51  
52  
53  
54

### 55 56 **Compensation database**

1  
2  
3 A de-identified workers' compensation administrative database for the period  
4 from 1986 was obtained from the VWA for the purpose of this study. The database  
5 contains information regarding the claimant, injury or disease, and benefits paid in  
6 relation to the claim. Records include information on the claimant and benefits paid.  
7  
8 The Australian Standard Type of Occurrence Classification System (TOOCS v3)<sup>18</sup>  
9  
10 was used to code the nature/mechanism of affliction. Occupation data were coded  
11 using Australian and New Zealand Standard Classification of Occupation  
12 (ANZSCO)<sup>19</sup>. The Australian New Zealand Standard Industry Classification (ANZSIC  
13 2006) was used to code industry data<sup>20</sup>. A detailed description of the compensation  
14 database can be found elsewhere<sup>11</sup>.  
15  
16  
17  
18  
19  
20  
21  
22  
23  
24

## 25 **Data analysis**

26  
27  
28 All accepted workers' compensation claims occurring between 1 January  
29 1995 and 31 December 2008 were included in this study. Descriptive statistics were  
30 used to provide an overview of initial (first claim of a worker) and recurrent claims by  
31 gender, age, nature of affliction (injury or disease) and type of benefits paid (income  
32 replacement and medical expenses). A recurrent claim in this study was defined as a  
33 second or any subsequent claim of a worker during the study period, and it could  
34 have occurred for the same as initial or a completely different reason. Two outcomes  
35 were considered in this study: the rates of initial and recurrent injury and disease  
36 over the 14 year period; and the number of compensated days away from work  
37 (extracted from the database), which was used as the indicator of 'work disability'<sup>21</sup>.  
38  
39  
40  
41  
42  
43  
44  
45  
46  
47  
48  
49  
50

51 The incidence of initial and recurrent claims per annum was calculated as a  
52 rate per 1,000 workers, for males and females. Denominator data was drawn from  
53 the Australian Bureau of Statistics (ABS) labour force survey for the state of Victoria  
54  
55  
56  
57  
58  
59  
60

(www.abs.gov.au). A fully adjusted for age and gender Poisson count regression model was used to determine annual changes in rates between initial and recurrent injury and disease. SPSS version 20.0 was used for all analyses.

## RESULTS

### Initial and recurrent workplace injury and disease

Over the study period of 14 years a total of 448,868 workers lodged compensation claims for 972,281 discrete occurrences of work-related injury or disease (Table 1). Recurrent injury and disease accounted for 53.4% of all claims. These were attributable to only 26.2% of all claimants.

Males were more likely to have a recurrent injury or disease than females. A majority of claims were for occupational injuries. The vast majority of claimants were 25-44 years old; however the incidence rates of the initial and recurrent injuries or diseases were highest in the youngest workers, 15-19 years of age.

Occupational diseases were more likely to result in subsequent workers' compensation claims (24.2% vs. 28.2%). The majority of claims were lodged for income replacement and/or medical expenses.

[Insert Table 1 here]

### Incidence of initial and recurrent workplace injury and disease

The rates of initial and recurrent workplace injury and disease per 1,000 working population are displayed in Figure 1. Figure 1A illustrates incidence per annum of initial and recurrent claims per 1,000 working population. The rates of initial injury reduced from 26.4/1,000 in 1995 to 12.7/1,000 in 2008 (or by 6.1% per annum,  $p < 0.0001$ , 95% CIs -6.3 to -5.8). The rates of recurrent injury decreased

1  
2  
3 from 24.9/1,000 in 1995 to 14.5/1,000 in 2008 (or by 3.5% per annum,  $p < 0.0001$ ,  
4  
5 95% CIs -3.7 to -3).  
6

7  
8 Figure 1B illustrates annual incidence rates per 1,000 working population of  
9  
10 initial and recurrent injury and disease, in males and females separately. The rates  
11  
12 of initial injury and disease in males decreased by 6.7% ( $p < 0.0001$ , 95% CIs -7.4 to -  
13  
14 5.9) than in females. However, the rates of the recurrent injury and disease in males  
15  
16 every year increased by 3.0%, ( $p < 0.0001$ , 95% CIs 2.4 to 3.7) when compared to  
17  
18 females. The incidence rates of recurrent injuries and diseases were higher than in  
19  
20 the initial claims by 4.5% ( $p < 0.0001$ , 95% CIs 3.9 to 5.3) in males, and by 7.4%,  
21  
22 ( $p < 0.0001$ , 95% CIs 5.0 to 9.8) in females.  
23  
24

25  
26 [Insert Figure 1 here]  
27

## 28 29 **Work disability**

30  
31 Table 2A summarizes work disability associated with the initial and recurrent  
32  
33 injury and disease. In total, over the study period of 14 years, workplace injury and  
34  
35 disease resulted in 188,978 years of full-time work loss. More than half (55.3%) of  
36  
37 this burden was caused by recurrent injury and disease.  
38  
39

40  
41 Males incurred 45,570 (38.7%) years of full time work loss due to the initial  
42  
43 injury, and 72,211 (61.3%) years - due to the recurrent injury and disease. Females  
44  
45 incurred 38,130 (54.8%) years of full time work loss during their initial claims. This  
46  
47 amount of time decreased to 31,404 (45.2%) years in recurrent injury and disease.  
48  
49 Occupational injuries accounted for 53,713 (44.8%) years of work disability in all  
50  
51 initial claims and 66,026 (55.2%) in recurrent injury. Work disability incurred for a  
52  
53 recurrent disease, relatively to the initial claims, was similar: 38,530 (55.6%) and  
54  
55 30,709 (44.4%) years of full time work loss respectively. Workers in the 45-54 years  
56  
57  
58  
59  
60

1  
2  
3 of age category incurred the highest amount of work loss– 24,973 years in initial and  
4  
5 36,493 years in recurrent injuries and diseases.  
6  
7

8 The average duration of time lost due to workplace injury and disease (Table  
9  
10 2B) was 85.6 (257.1) days; however it was higher for recurrent claims (93.4(276.5)  
11  
12 days). The average duration of time lost varied greatly across the age categories of  
13  
14 injured workers and it increased with workers' age.  
15

16  
17 [Insert Table 2 here]  
18  
19

## 20 **DISCUSSION**

### 21 **Principal findings**

22  
23  
24  
25 This large-scale administrative data study, designed to provide a population-  
26  
27 based overview of workers' compensation claims, showed that a recurrent workplace  
28  
29 injury and disease is frequent and associated with a substantial work disability. We  
30  
31 established that over the 14 year study period, 448,868 workers in the state of  
32  
33 Victoria, Australia, lodged 972,281 compensation claims, 53.4 % of them were filed  
34  
35 for a recurrent injury or disease (Table 1). The incidence rates were highest in the  
36  
37 youngest workers, possibly due to the denominator accounting for the full-time  
38  
39 employees. Younger workers usually choose temporary or part-time employment,  
40  
41 they are less experienced and are less aware of hazardous working conditions;  
42  
43 therefore are at a higher risk of occupational injuries<sup>22</sup>. Different patterns for men  
44  
45 and women for recurrent injuries and diseases (Figure 1B) are associated with the  
46  
47 lower number of women returning to work after the initial injury, which might occur to  
48  
49 the mental stress, depressive symptoms and vulnerability at work<sup>23</sup>. In agreement  
50  
51 with the previously reported findings we observed that rates of work-related injury  
52  
53 and disease were declining, which is probably associated with legislative changes,  
54  
55  
56  
57  
58  
59  
60

1  
2  
3 unemployment rates or seasonal affects, and, most importantly, with better  
4  
5 strategies and increased effectiveness of injury prevention<sup>14 15 24 25</sup>.  
6  
7

8  
9 In both initial and recurrent injuries/diseases the work disability increased with  
10  
11 claimants' age, which possibly was related to claimants' comorbidities, changes in  
12  
13 physical and mental capacity or attitudes to return to work<sup>26 27</sup>. In addition, we found  
14  
15 that the majority (104,556 years) of time lost from work was from the recurrent claims  
16  
17 (Table 2A). This is equivalent to ~10.4 days for each working person in Victoria.  
18  
19 Despite that sickness absence as a proportion of working time is decreasing, these  
20  
21 figures are still substantial and represent a significant cost to the economy<sup>28</sup>.  
22  
23

#### 24 **Strengths and weaknesses of the study**

25  
26  
27 The first strength of this study is the large and exclusive compensation  
28  
29 research data source, containing detailed and objective information on workers, their  
30  
31 injuries and diseases. Entries of the dataset are unique and no duplicate information  
32  
33 is recorded. The second and principal strength is that, to our knowledge, this is the  
34  
35 first study to summarize the overall impact of work disability and annual trends of  
36  
37 subsequent work-related injury and disease, as most of the past studies treated  
38  
39 claims as single and discrete events<sup>14 15 29-31</sup>. Earlier published scientific papers  
40  
41 focused on the first return-to-work and time lost on temporary disability benefits as  
42  
43 outcomes of the workplace related injury. These studies concluded that work-related  
44  
45 injury and illness affects not only injured workers, but also employers, society and  
46  
47 government<sup>7 29 32-37</sup>. Alternatively, only a few recent studies emphasized the burden  
48  
49 of subsequent workers' compensation claims; however these studies analysed only  
50  
51 the initial and second claims, but did not consider any further work-related injuries or  
52  
53 illnesses<sup>10-12 38</sup>. Lack of understanding of the overall impact of a recurrent workplace  
54  
55  
56  
57  
58  
59  
60



1  
2  
3 injury and disease instigates a significant dilemma associated with employment rates  
4 and earnings of injured workers, adverse effects on productivity and costs, including  
5 those associated with compensation<sup>9 33 39</sup>.  
6  
7  
8  
9

10 The first weakness of this study is that it is Victoria only specific study, and the  
11 database does not cover the entire population, certain injuries maybe underreported  
12 and, therefore results published here maybe underrepresented. i.e. workers may not  
13 claim for mental health related issues, they possibly have claimed in other  
14 institutions in the past or they are self-covered<sup>40 41</sup>. Secondly, we do not have  
15 information on claimants return to work as these dates are not recorded consistently  
16 by the compensation authority, particularly for periods before the year 2004/5. The  
17 reliability of this data is improving as the VWA gains more experience with collecting  
18 return to work outcomes. It is difficult to estimate the magnitude of these impacts  
19 without undertaking a comprehensive data linkage between jurisdictional workers'  
20 compensation and health datasets<sup>11 42</sup>. Thirdly, administrative data collection errors  
21 might have also occurred, which could have affected the nature and dates of  
22 subsequent injuries or diseases. In addition, legislative changes and organizational  
23 policies might have affected claim rates reported here<sup>43</sup>. It is also important to  
24 acknowledge that the present study does not report trends in claim costs or cost  
25 effectiveness analysis over the years; however it is already known that repeat  
26 workers' compensation claims are associated with increased costs of medical and  
27 like services and weekly compensation paid<sup>11</sup>.  
28  
29  
30  
31  
32  
33  
34  
35  
36  
37  
38  
39  
40  
41  
42  
43  
44  
45  
46  
47  
48  
49

## 50 **Conclusions and policy implications**

51  
52  
53 The most effective strategy for preventing work-related disability is a primary  
54 prevention approach, that is, preventing the initial work related injury and disease<sup>44</sup>.  
55  
56  
57  
58  
59  
60

1  
2  
3 Findings of the current study highlight a steady decline in the number of initial work-  
4 related injury and disease (Figure 1), indicating that primary injury prevention  
5 strategies at workplace are becoming more and more efficient over the years<sup>14</sup>. An  
6 accelerating reduction of recurrent injuries and diseases suggests that secondary  
7 prevention initiatives were possibly reviewed and addressed more carefully after  
8 1999. Despite the current return-to-work efforts and decreasing rates of the initial  
9 and recurrent injury and disease, there is probably still more room for improvement.  
10 Current injury prevention policies and procedures need to be regularly revised,  
11 focussing on more efficient secondary prevention<sup>45-47</sup>. A key to a successful  
12 secondary prevention is not only appropriately trained staff, but also clearly identified  
13 risk factors at workplace and a combination of early predictors for poor long-term  
14 outcomes in workers<sup>16 17</sup>. Both the injured worker and their employer are known to  
15 the compensation authorities, and therefore can be targeted by OH&S regulators  
16 and policy makers. It is essential to consider other factors such as precarious  
17 working conditions, worker's age, gender and comorbidities<sup>48-50</sup>. The type of a  
18 recurrent injury and disease is also known to the compensation authorities; therefore  
19 if a subsequent claim was lodged a long after the initial claim, or under completely  
20 different circumstances, alternative prevention measures should be considered.

21  
22  
23  
24  
25  
26  
27  
28  
29  
30  
31  
32  
33  
34  
35  
36  
37  
38  
39  
40  
41  
42  
43  
44  
45  
46  
47  
48  
49  
50  
51  
52  
53  
54  
55  
56  
57  
58  
59  
60

Secondary prevention examples may include activities that promote lifestyle changes and aim at improving the overall health of injured workers, restructuring the current workplace where the injury occurs, providing suitably modified work for injured workers, recommending them regular exams and screening tests or surveillance systems<sup>51</sup>. Return-to-work coordinators, clinicians and care management support also play an important role in workers' return-to-work and re-injury prevention. Their efforts may need to be revisited with incentives provided so

1  
2  
3 reduced costs for workers' compensation healthcare and increased safety practises  
4  
5 are implemented<sup>39</sup>. Education of workers to be more aware of hazards associated  
6  
7 with their job may be an important step forward. Introducing work wellness and  
8  
9 rehabilitation programs, providing counselling and job training for returning-to-work  
10  
11 staff members may also assist in a further reduction of re-injury<sup>2 39 51 52</sup>.  
12  
13

14  
15  
16 **Acknowledgements** The authors thank Susan Tinsley and Catherine Smith for their  
17  
18 support during the development of this paper.  
19

20  
21 **Contributors** Both authors equally participated in the study design and coordination.  
22  
23 Both authors read and approved the final manuscript.  
24

25  
26 **Funding** This research and the involvement of Dr Ruseckaite and Dr Collie in the  
27  
28 study was provided by a research grant from WorkSafe Victoria.  
29

30  
31 **Competing interests** None.  
32

33  
34 **Ethics approval** Monash University Human Research Ethics Committee,  
35  
36 Melbourne, Australia.

37  
38 **Provenance and peer review** Not commissioned; externally peer reviewed.  
39

40  
41 **Data Sharing** Workers compensation data used in this study are collected by the WorkSafe  
42  
43 Victoria and held by the ISCRR who regularly respond to data requests from the public.  
44  
45  
46  
47  
48  
49  
50  
51  
52  
53  
54  
55  
56  
57  
58  
59  
60

## REFERENCES

1. Wadell G, Burton A. Is work good for your health and well-being? *Department for Work and Pensions* 2006.
2. Pransky G, Loisel P, Anema J. Work disability prevention research: current and future prospects. *J Occup Rehabil* 2011;21:287-292.
3. Anema J, Schellart A, Cassidy J *et al*. Can cross country differences in return-to-work after chronic occupational back pain be explained? An explanatory analysis on disability policies in a six country cohort study. *J Occup Rehabil* 2009;19:419-426.
4. Campolieti M. Multiple state hazard models and workers' compensation claims: an examination of workers compensation data from Ontario. *Acc Anal Prev* 2000;33:197-202.
5. Garcy P, Mayer T, Gatchel R. Recurrent or new injury outcomes after return to work in chronic disabling spinal disorders: tertiary prevention efficacy and functional restoration treatment. *Spine* 1996;21:952-959.
6. Shuford H, Restrepo T, Beaven B *et al*. Trends in components of medical spending within workers compensation: results from 37 states combined. *J Occup Environ Med* 2009;51.
7. Smith P, Chen C, Hogg-Johnson S *et al*. Trends in the health care use in expenditures associated with no-lost-time claims in Ontario: 1991 to 2006. *JOEM* 2011;53:211-217.
8. Carlos-Rivera F, Aguilar-Madrid G, Gómez-Montenegro P *et al*. Estimation of health-care costs for work-related injuries in the Mexican Institute of Social Security. *Am J Ind Med* 2009;52:195-201.
9. Utterback D, Schnorr T, Silverstein B *et al*. Occupational health and safety surveillance and research using workers' compensation data. *JOEM* 2012;00:1-5.
10. Cherry N, Sithole F, Beach J *et al*. Second WCB claims: who is at risk? *Can J Public Health* 2010;101.
11. Ruseckaite R, Collie A. Repeat workers' compensation claims: risk factors, costs and work disability. *BMC Public Health* 2011;11:492.
12. Bena A, Mamo C, Marinacci C *et al*. Risk of repeat accidents by economic activity in Italy. *Safety Sc* 2006;44:297-312.
13. Yassi A, Gilbert M, Cvitkovich Y. Trends in injuries, illnesses, and policies in Canadian healthcare workplaces. *Can J Public Health* 2005;96:333-339.

- 1
- 2
- 3 14. Breslin F, Smith P, Moore I. Examining the decline in lost-time claim rates
- 4 across age groups in Ontario between 1991 and 2007. *Occup Environ Med*
- 5 2011;68:813-817.
- 6
- 7 15. Moore I, Tompa E. Understanding changes over time in workers'
- 8 compensation claim rates using time series analytical techniques *Occup*
- 9 *Environ Med* 2011;68:837-841.
- 10
- 11 16. Arocena P, Nunez P, Villanueva M. The impact of prevention measures and
- 12 organizational factors on occupational injuries. *Safety Science* 2008;46:1369-
- 13 1384.
- 14
- 15 17. Guzman J, Yassi A, Baril R *et al*. Decreasing occupational injury and
- 16 disability: the convergence of systems theory, knowledge transfer and action
- 17 research. *Work* 2008;30:229-239.
- 18
- 19 18. Government Australialia. *Type of occurence classification system, 3rd edition*
- 20 *(revision 1)*, Canberra: Australian Safety and Compensation Council 2008.
- 21
- 22 19. ANZSCO - *Australian and New Zealand Standard Classification of*
- 23 *Occupations*. In: Statistics ABo (ed.), Canberra 2006.
- 24
- 25 20. *Australian and New Zealand Standad Industrial Classification (ANZSIC)*. In:
- 26 Zealand. ABoSaSN (ed.), Canberra 2006.
- 27
- 28 21. Berecki-Gisolf J, Clay F, Collie A *et al*. Predictors of sustained return to work
- 29 after work-related injury or disease:insights from workers' compensation
- 30 claims records. *J Occup Rehabil* 2011;22:283-291.
- 31
- 32 22. Virtanen M, Kivimaki M, Joensuu M *et al*. Temporary employment and health:
- 33 review. *Int J Epidemiol* 2005;34:610-622.
- 34
- 35 23. Koopmans P, Bultmann U, Roelen C *et al*. Recurrence of sickness absence
- 36 due to common mental disorders. *Int Arch Occup Environ Health*
- 37 2011;84:193-201.
- 38
- 39 24. Gatty C, Turner M, Buitendorp D *et al*. The effectiveness of back pain and
- 40 injury prevention programs in the workplace *Work* 2003;20:275-266.
- 41
- 42 25. Foley M, Fan Z, Rauser E *et al*. The impact of regulatory enforcement and
- 43 consultation visits on workers' compensation claims incidence rates and
- 44 costs, 1999-2008. *Am J Ind Med* 2012;55:976-990.
- 45
- 46 26. Ilmarinen J. Aging workers. *Occup Environ Med* 2001;58:546-552.
- 47
- 48 27. Kenny G, Yardley J, Martineau L *et al*. Physical work capacity in older adults:
- 49 implications for the aging workers. *Am J Ind Med* 2008;51:610-625.
- 50
- 51 28. Black C. *Working for a healthier tomorrow*, London 2008.
- 52
- 53
- 54
- 55
- 56
- 57
- 58
- 59
- 60

- 1
- 2
- 3 29. Berecki-Gisolf J, Clay F, Collie A *et al*. The impact of ageing on work disability
- 4 and return to work: insights from workers' compensation claim records *JOEM*
- 5 2012;54:318-327.
- 6
- 7 30. Johnson D, Fry T. *Factors affecting return to work after injury: a study for the*
- 8 *Victorian WorkCover authority Melbourne Institute Working Paper No. 28/02*
- 9 *2002.*
- 10
- 11 31. Smith P, Hogg-Johnson S, Mustard C *et al*. Comparing the risk factors
- 12 associated with serious versus and less serious work-related injuries in
- 13 Ontario between 1991 and 2006. *Am J Ind Med* 2012;55:84-92.
- 14
- 15 32. Boden L, Biddle E, Spieler E. Social and economic impacts of workplace
- 16 illness and injury: current and future directions for research. *Am J Ind Med*
- 17 2001;40:398-342.
- 18
- 19 33. Boden L, Galizz M. Economic consequences of workplace injuries and
- 20 illnesses: lost earnings and benefit adequacy. *Am J Ind Med* 1999;36:487-
- 21 503.
- 22
- 23 34. John F, Kerr M, Brooker A *et al*. Disability resulting from occupational low
- 24 back pain: part II: what do we know about secondary prevention? A review of
- 25 the scientific evidence on prevention after disability begins. *Spine*
- 26 1996;21:2918-2929.
- 27
- 28 35. Leigh J, Markowitz S, Fahs M *et al*. Occupational illness and injury in the
- 29 United States: estimates of costs, morbidity, and mortality. *Arch Intern Med*
- 30 1997;157:1557-1568.
- 31
- 32 36. Miller T, Galbraith M. The costs of occupational injury in the United States.
- 33 *Accid Anal & Prevention* 1995;27:741-747.
- 34
- 35 37. Reville R, Bhattacharya J, Sager L. Measuring the economic consequences of
- 36 workplace injuries. *Am J Ind Med* 2001;40:452-463
- 37
- 38 38. Wasiak R, Pransky G, Webster B. Methodological challenges in studying
- 39 recurrence of low back pain. *J Occup Rehabil* 2003;13:21-31.
- 40
- 41 39. Wickizer T, Franklin G, Fulton-Kehoe D *et al*. Improving quality, preventing
- 42 disability and reducing costs in workers' compensation healthcare. *Med Care*
- 43 2011;49:1105-1111.
- 44
- 45 40. Collie A, Pan Y, Britt H *et al*. Coverage of work-related injuries by workers'
- 46 compensation in Australian general practice. *Int J Work Comp* 2011;3:1-10.
- 47
- 48 41. Driscoll T, Mitchell R, Mandryk J *et al*. Coverage of work related fatalities in
- 49 Australia by compensation and occupational health and safety agencies.
- 50 *Occup Environ Med* 2003;60:195-200.
- 51
- 52
- 53
- 54
- 55
- 56
- 57
- 58
- 59
- 60

- 1  
2  
3 42. Ruseckaite R, Clay F, Collie A. Second workers' compensation claims: Who is  
4 at risk? Analysis of WorkSafe Victoria, Australia compensation claims. *Can J*  
5 *Public Health* 2012;103:309-313.  
6  
7 43. Cameron I, Rebbeck T, Sindhusake D. Legislative change is associated with  
8 improved health status in people with whiplash. *Soine* 2008;33:250-254.  
9  
10 44. Feldstein A, Breen V, Dana N. Prevention of work-related disability. *J Prev*  
11 *Med* 1998;14:33-39.  
12  
13 45. Association APH. *Worker's compensation reform 2009*.  
14  
15 46. Ammendolia C, Cassidy D, Soklaridis S *et al*. Designing a workplace return-  
16 to-work program for occupational low back pain: an intervention mapping  
17 approach. *BMC Musculoskeletal Disorders* 2009;10:doi:10.1186/1471-2474-  
18 10-65.  
19  
20 47. Sullivan M, Ward L, Tripp D *et al*. Secondary prevention of work disability:  
21 community-based psychosocial intervention for musculoskeletal disorders. *J*  
22 *Occup Rehabil* 2005;15:377-392.  
23  
24 48. Quinlan M, Mayhew C. Precarious employment and workers' compensation.  
25 *Int J Law Psych* 1999;22:491-520.  
26  
27 49. Restrepo T, Shuford H. *Workers compensation and the aging workforce*. In:  
28 Brief NR (ed.) 2011.  
29  
30 50. Smith C, Silverstein B, Bonauto D *et al*. Temporary workers in Washington  
31 state. *Am J Indust Med* 2010;53:135-145.  
32  
33 51. Feuerstein M. A multidisciplinary approach to the prevention, evaluation, and  
34 management of work disability. *J Occup Rehabil* 1991;1:5-12.  
35  
36 52. Sullivan M, Feuerstein M, Gatchel R *et al*. Integrating psychosocial and  
37 behavioural interventions to achieve optimal rehabilitation outcomes. *J Occup*  
38 *Rehabil* 2005;15:475-489.  
39  
40  
41  
42  
43  
44  
45  
46  
47  
48  
49  
50  
51  
52  
53  
54  
55  
56  
57  
58  
59  
60

Table 1. Profile of initial and recurrent workers' compensation claims by category in Victoria, 1995 to 2008.

| Category               | Initial claims |                     |          |          | Recurrent claims |                     |          |          | Total claims |                     |          |          | p     |       |
|------------------------|----------------|---------------------|----------|----------|------------------|---------------------|----------|----------|--------------|---------------------|----------|----------|-------|-------|
|                        | N              | Rate,<br>95%CI      | Row<br>% | Col<br>% | N                | Rate,<br>95%CI      | Row<br>% | Col<br>% | N            | Rate,<br>95%CI      | Row<br>% | Col<br>% | Row   | Col   |
| Total claims           | 448,868        | 19.1<br>[15.2-20.1] | 46.2     | -        | 523,413          | 22.3<br>[21.2-23.4] | 53.4     | -        | 972,281      | 41.5<br>[39.4-43.5] | 100      | -        | 0.000 | -     |
| Total claimants        | 448,868        | 19.1<br>[15.2-20.1] | 76.8     | -        | 135,349          | 5.8<br>[5.5-6.1]    | 26.2     | -        | 584,217      | 24.9<br>[23.7-26.2] | 100      | -        | 0.000 | -     |
| Claims per<br>claimant | 1              | -                   | -        | -        | 3.86             | -                   | -        | -        | 1.66         | -                   | -        | -        | -     | -     |
| Gender*                |                |                     |          |          |                  |                     |          |          |              |                     |          |          |       |       |
| Males                  | 274,915        | 17.7<br>[16.8-18.5] | 75.1     | 61.2     | 91,072           | 5.9<br>[5.6-6.1]    | 24.9     | 67.3     | 365,987      | 23.5<br>[22.3-24.7] | 100      | 62.6     | 0.000 | 0.000 |
| Females                | 163,059        | 20.7<br>[19.6-21.7] | 79.8     | 36.3     | 41,111           | 5.2<br>[5.0-5.5]    | 20.2     | 30.4     | 204,170      | 25.9<br>[24.6-27.2] | 100      | 34.9     | 0.000 | 0.000 |
| Missing                | 10,894         | 0.46<br>[0.44-0.49] | 77.5     | 2.4      | 3,166            | 0.13<br>[0.13-0.14] | 22.5     | 2.3      | 14,060       | 0.59<br>[0.57-0.63] | 100      | 2.5      | 0.003 | NS    |
| Age category*          |                |                     |          |          |                  |                     |          |          |              |                     |          |          |       |       |
| 15-19                  | 33,393         | 54.3<br>[51.6-57.0] | 76.0     | 7.4      | 10,571           | 17.2<br>[16.3-18.0] | 24.0     | 7.8      | 43,964       | 71.5<br>[67.9-75.1] | 100      | 7.5      | 0.000 | NS    |
| 20-24                  | 68,421         | 27.6<br>[26.2-29.0] | 76.6     | 15.2     | 20,858           | 8.4<br>[8.0-8.8]    | 23.4     | 15.4     | 89,279       | 36.0<br>[34.2-37.8] | 100      | 15.3     | 0.000 | NS    |
| 25-34                  | 117,817        | 18.2<br>[17.3-19.1] | 76.5     | 26.2     | 36,132           | 5.6<br>[5.3-5.9]    | 23.5     | 26.7     | 153,949      | 23.8<br>[22.6-25.0] | 100      | 26.4     | 0.000 | NS    |
| 35-44                  | 103,799        | 17.2<br>[16.4-18.1] | 75.3     | 23.1     | 33,963           | 5.6<br>[5.4-5.9]    | 24.7     | 25.1     | 137,762      | 22.9<br>[21.7-24.0] | 100      | 23.6     | 0.000 | 0.000 |
| 45-54                  | 87,619         | 16.5<br>[15.7-17.3] | 77.1     | 19.5     | 26,057           | 4.9<br>[4.7-5.2]    | 22.9     | 19.3     | 113,676      | 21.4<br>[20.3-22.5] | 100      | 19.5     | 0.000 | NS    |
| 55-59                  | 24,086         | 15.4<br>[14.6-16.2] | 81.0     | 5.4      | 5,667            | 3.6<br>[3.4-3.8]    | 19.0     | 4.2      | 29,753       | 19.0<br>[18.1-20.0] | 100      | 5.1      | 0.000 | 0.000 |
| 60-64                  | 10,828         | 14.8<br>[14.1-15.6] | 85.6     | 2.4      | 1,817            | 2.5<br>[2.4-2.6]    | 14.4     | 1.3      | 12,645       | 17.3<br>[16.5-18.2] | 100      | 2.2      | 0.000 | 0.003 |
| 65+                    | 2,905          | 10.4<br>[9.9-11.0]  | 91.1     | 0.6      | 284              | 1.0<br>[1.0-1.1]    | 8.9      | 0.2      | 3,189        | 11.5<br>[10.9-12.0] | 100      | 0.5      | 0.000 | NS    |



1  
2  
3  
4  
5  
6  
7  
8  
9  
10  
11  
12  
13  
14  
15  
16  
17  
18  
19  
20  
21  
22  
23  
24  
25  
26  
27  
28  
29  
30  
31  
32  
33  
34  
35  
36  
37  
38  
39  
40  
41  
42  
43  
44  
45  
46  
47  
48  
49

| Nature of affliction                     |         |             |      |      |         |             |      |      |         |             |     |      |       |       |  |
|------------------------------------------|---------|-------------|------|------|---------|-------------|------|------|---------|-------------|-----|------|-------|-------|--|
| Injury                                   | 340,203 | 14.5        | 47.4 | 75.8 | 376,033 | 16.0        | 52.6 | 71.8 | 716,236 | 30.5        | 100 | 73.6 | 0.000 | 0.000 |  |
|                                          |         | [13.8-15.2] |      |      |         | [15.2-16.8] |      |      |         | [29.0-32.1] |     |      |       |       |  |
| Disease                                  | 108,665 | 4.6         | 42.4 | 24.2 | 147,380 | 6.3         | 57.6 | 28.2 | 256,045 | 10.9        | 100 | 26.4 | 0.000 | 0.000 |  |
|                                          |         | [4.4-4.9]   |      |      |         | [6.0-6.6]   |      |      |         | [10.4-11.5] |     |      |       |       |  |
| Compensation benefits paid               |         |             |      |      |         |             |      |      |         |             |     |      |       |       |  |
| Income replacement +/- medical expenses^ | 257,082 | 11.0        | 46.8 | 57.3 | 292,340 | 12.5        | 53.2 | 55.8 | 549,422 | 23.4        | 100 | 56.5 | 0.000 | 0.000 |  |
|                                          |         | [10.4-11.5] |      |      |         | [11.8-13.1] |      |      |         | [22.3-24.6] |     |      |       |       |  |
| Medical expenses only                    | 191,786 | 8.2         | 45.4 | 42.7 | 231,073 | 9.9         | 54.6 | 44.2 | 422,859 | 18.0        | 100 | 43.5 | 0.000 | 0.000 |  |
|                                          |         | [7.8-8.6]   |      |      |         | [9.4-10.3]  |      |      |         | [17.1-18.9] |     |      |       |       |  |

\* The rates are presented for claimants, not claims

^ "Income replacement +/- medical expenses" group represents these claimants, who had time off work and/or required compensation for medical expenses

For peer review only

Table 2A. A total work disability arising from initial and recurrent workers compensation claims in Victoria, 1995 to 2008.

| Category             | Initial claims |       |       | Recurrent claims |       |       | Total claims |       |       | p     |       |
|----------------------|----------------|-------|-------|------------------|-------|-------|--------------|-------|-------|-------|-------|
|                      | N              | Row % | Col % | N                | Row % | Col % | N            | Row % | Col % | Row   | Col   |
| Work- loss, years    |                |       |       |                  |       |       |              |       |       |       |       |
| All time-loss claims | 84,422         | 44.7  | -     | 104,556          | 55.3  | -     | 188,978      | 100   | -     | 0.000 | -     |
| Males                | 45,570         | 38.7  | 53.4  | 72,211           | 61.3  | 69.1  | 117,781      | 100   | 62.3  | 0.000 | 0.000 |
| Females              | 38,130         | 54.8  | 45.2  | 31,404           | 45.2  | 30.1  | 69,534       | 100   | 36.8  | 0.000 | 0.000 |
| Injury               | 53,713         | 44.8  | 63.6  | 66,026           | 55.2  | 63.1  | 119,739      | 100   | 63.4  | 0.000 | 0.000 |
| Disease              | 30,709         | 44.4  | 36.4  | 38,530           | 55.6  | 36.9  | 69,239       | 100   | 36.6  | 0.000 | NS    |
| Age category         |                |       |       |                  |       |       |              |       |       |       |       |
| 15-19                | 2,170          | 84.6  | 2.6   | 396              | 15.4  | 0.4   | 2,566        | 100   | 1.4   | 0.000 | 0.007 |
| 20-24                | 6,050          | 66.8  | 7.2   | 3,010            | 33.2  | 2.9   | 9,060        | 100   | 4.8   | 0.000 | 0.000 |
| 25-34                | 17,350         | 50.5  | 20.6  | 16,980           | 49.5  | 16.2  | 34,330       | 100   | 18.2  | NS    | 0.000 |
| 35-44                | 23,606         | 44.0  | 28.0  | 30,012           | 56.0  | 28.7  | 53,618       | 100   | 28.4  | 0.000 | NS    |
| 45-54                | 24,943         | 40.6  | 29.5  | 36,493           | 59.4  | 34.9  | 61,436       | 100   | 32.5  | 0.000 | 0.000 |
| 55-59                | 7,426          | 37.0  | 8.8   | 12,650           | 63.0  | 12.1  | 20,076       | 100   | 10.6  | 0.000 | 0.000 |
| 60-64                | 2,468          | 35.8  | 2.9   | 4,418            | 64.2  | 4.2   | 6,886        | 100   | 3.6   | 0.000 | 0.006 |

|     |     |      |     |     |      |     |       |     |     |       |       |
|-----|-----|------|-----|-----|------|-----|-------|-----|-----|-------|-------|
| 65+ | 408 | 40.6 | 2.6 | 597 | 59.4 | 0.6 | 1,005 | 100 | 0.5 | 0.000 | 0.008 |
|-----|-----|------|-----|-----|------|-----|-------|-----|-----|-------|-------|

Table 2B. An average and median work disability arising from initial and recurrent workers compensation claims in Victoria, 1995 to 2008.

| Category             | Initial claims  |                    | Recurrent claims |                    | Total claims    |                    | p     |
|----------------------|-----------------|--------------------|------------------|--------------------|-----------------|--------------------|-------|
|                      | Mean (SD), days | Median (IQR), days | Mean (SD), days  | Median (IQR), days | Mean (SD), days | Median (IQR), days | Row   |
| All time-loss claims | 85.6 (257.1)    | 10 (10-38)         | 93.4 (276.5)     | 10 (10-39)         | 89.8 (267.6)    | 10 (10-39)         | 0.000 |
| Males                | 76.2 (241.3)    | 10 (10-34)         | 86.4 (267.2)     | 10 (10-34)         | 82.2 (256.7)    | 10 (10-34)         | 0.000 |
| Females              | 102.9 (284.2)   | 10 (10-50)         | 118.5 (309.6)    | 10 (10-65)         | 109.4 (295.1)   | 10 (10-56)         | 0.000 |
| Injury               | 75.1 (244.0)    | 10 (10-30)         | 86.1 (275.9)     | 10 (10-30)         | 80.7 (261.2)    | 10 (10-30)         | 0.000 |
| Disease              | 113.9 (286.5)   | 14 9 (10-71)       | 109.3 (277.1)    | 11 (10-65)         | 111.3 (281.3)   | 13 (10-67)         | 0.000 |
| Age category         |                 |                    |                  |                    |                 |                    |       |
| 15-19                | 29.5 (91.6)     | 10 (10-16)         | 26.7 (91.6)      | 10 (10-10)         | 29.0 (91.6)     | 10 (10-15)         | NS    |
| 20-24                | 40.1 (123.7)    | 10 (10-21)         | 40.3 (135.7)     | 10 (10-15)         | 40.2 (127.8)    | 10 (10-20)         | NS    |
| 25-34                | 68.5 (207.6)    | 10 (10-31)         | 65.5 (205.9)     | 10 (10-26)         | 66.9 (206.7)    | 10 (10-29)         | NS    |
| 35-44                | 102.7 (286.6)   | 10 (10-48)         | 92.6 (275.6)     | 10 (10-39)         | 96.8 (280.3)    | 10 (10-42)         | 0.000 |
| 45-54                | 127.2 (349.8)   | 11 (10-63)         | 120.7 (340.6)    | 10 (10-55)         | 123.2 (344.3)   | 10 (10-58)         | 0.034 |
| 55-59                | 139.3 (336.9)   | 15 (10-70)         | 136.1 (337.2)    | 12 (10-67)         | 137.5 (337.1)   | 13 (10-68)         | NS    |

|       |               |               |               |            |               |            |    |
|-------|---------------|---------------|---------------|------------|---------------|------------|----|
| 60-64 | 106.9 (213.5) | 16 (10-72)    | 101.6 (204.7) | 15 (10-72) | 103.5 (207.8) | 16 (10-72) | NS |
| 65+   | 80.6 (122.5)  | 25 (10-85.75) | 76.8 (127.4)  | 20 (10-70) | 78.3 (125.5)  | 22 (10-77) | NS |

For peer review only

1  
2  
3 **The incidence and impact of recurrent workplace injury and disease. A cohort**  
4 **study of WorkSafe Victoria, Australia compensation claims**  
5  
6  
7  
8  
9

10 **Authors:** Rasa Ruseckaite, PhD<sup>1</sup> & Alex Collie, PhD<sup>1,2</sup>.  
11

- 12  
13  
14 1. Institute for Safety, Compensation and Recovery Research, Monash  
15 University, Melbourne, Australia  
16  
17 2. Department of Epidemiology and Preventive Medicine, Monash University,  
18 Melbourne Australia.  
19  
20  
21  
22  
23  
24  
25  
26  
27

28 **Corresponding Author:**

29  
30 Rasa Ruseckaite

31  
32 ISCRR, Level 11, 499 St Kilda Rd

33  
34 Melbourne, VIC 3004 Australia

35  
36 Tel: +61 3 9097 0608

37  
38 Fax: +61 3 9097 0699

39  
40 E-mail: rasa.ruseckaite@monash.edu  
41  
42  
43  
44  
45  
46  
47  
48  
49

50 **Keywords:** Compensation, re-injury; work-related; incidence  
51

52 **Word count:** Abstract (228), Body Text (2,484)  
53  
54  
55  
56  
57  
58  
59  
60

## ABSTRACT

**Objective:** To determine the incidence and impact of recurrent workplace injury and disease over the period 1995 to 2008.

**Design:** Population-based cohort study using data from the state workers' compensation system database.

**Setting:** State of Victoria, Australia.

**Participants:** A total of 448,868 workers with an accepted workers' compensation claim between 1 January 1995 and 31 December 2008 were included into this study. Of them, 135,349 had at least one subsequent claim accepted for a recurrent injury or disease during this period.

**Main outcome measures:** Incidence of initial and recurrent injury and disease claims and time lost from work for initial and recurrent injury and disease.

**Results:** Over the study period 448,868 workers lodged 972,281 claims for discrete occurrences of work-related injury or disease. 53.4% of these claims were for recurrent injury or disease. On average, the rates of initial claims dropped by 5.6%, 95% CI [-5.8, -5.7] per annum, while the rates of recurrent injuries decreased by 4.1%, 95% CI [-4.2, -4.0]. In total, workplace injury and disease resulted in 188,978 years of loss in full time work, with 104,556 of them being for the recurrent injury.

**Conclusions:** Recurrent work-related injury and disease is associated with a substantial social and economic impact. There is an opportunity to reduce the social, health and economic burden of workplace injury by enacting secondary prevention programs targeted at workers who have incurred an initial occupational injury or disease.

## ARTICLE SUMMARY

### Article focus

- To determine the incidence and impact of recurrent workplace injury and disease in Victoria, Australia over the period 1995 to 2008.

### Key messages

- A recurrent workplace injury and disease is frequent and associated with a substantial work disability. We established that over the 14 year study period in the state of Victoria, Australia more than 50 % of claims were filed for a recurrent injury or disease. In addition, we found that the majority (104,556 years) of time lost from work was from the recurrent claims.
- There is an opportunity to reduce the social, health and economic burden of workplace injury by enacting secondary prevention programs targeted at workers who have incurred an initial occupational injury or disease.

### Strengths and limitations of this study

- The principal strength is that this is the first study to summarize the overall impact of work disability and annual trends of subsequent work-related injury and disease, as most of the past studies treated claims as single and discrete events.
- The main weakness of this study is that it is Victoria only specific study, and the database does not cover the entire population, certain injuries maybe underreported and, therefore results published here maybe underrepresented. i.e. workers may not claim for mental health related issues, they possibly have claimed in other institutions in the past or they are self-covered.

## INTRODUCTION

Work is now generally acknowledged as being good for health<sup>1</sup>. There is a growing trend internationally to encourage early return-to-work after injury or illness as a means of facilitating recovery, wellbeing and social inclusion. Conversely, periods of unemployment can lead to poor health or exacerbate existing health issues<sup>1</sup>. Disability arising from workplace injury and illness is also now the subject of substantial public policy and academic interest<sup>2</sup>.

Workers' compensation claims data has been an important source of information to describe the incidence and impact of work-related injury and disease within and across jurisdictions internationally<sup>3-5</sup>. Studies in this area reveal the substantial health and economic costs of workplace injury and illness<sup>6,7</sup>. For example, the total cost of health care of officially recognized injured workers in Mexico in 2005 was \$753,420,222 USD<sup>8</sup>. Similarly, workers' compensation insurance for US workers in 2007 cost \$85 billion USD<sup>9</sup>. Over the past two decades the concept of 'work disability', usually measured as the number of days lost from work, has emerged as a means of estimating the burden of workplace injury and disease<sup>2</sup>.

More recently, we and others have utilised workers' compensation system data to focus on recurrent workplace injury or disease<sup>10-12</sup>. These studies in discrete populations or over discrete time periods have demonstrated that injury and disease recurrences contribute substantially to the overall burden of workplace injury and disease. There are numerous examples of population based estimates of the overall burden of workplace injury and disease, including detailed epidemiological analysis of time series<sup>13-15</sup>. However, these studies do not differentiate between initial and



1  
2  
3 recurrent episodes of injury or disease. Examining annual trends of the initial and  
4  
5 recurrent occupational injury may provide us a better understanding of the relative  
6  
7 effectiveness of primary and secondary prevention initiatives<sup>16 17</sup>.  
8  
9

10 The current study sought to determine the incidence and impact of a recurrent  
11  
12 workplace injury and disease in the state of Victoria, Australia over a 14 year period  
13  
14 using the data from the state workers' compensation system. This study has two  
15  
16 aims: 1) to describe the annual incidence of initial and recurrent workplace injury and  
17  
18 disease, and 2) to summarize the disability associated with initial and recurrent  
19  
20 workplace injury and disease.  
21  
22

## 23 **METHODS**

### 24 **Setting**

25  
26  
27  
28  
29 Victoria is a state of approximately 5.5 million people with an approximate full-  
30  
31 time working population of 2.4 million (year 2010 data obtained from  
32  
33 www.abs.gov.au). The Victorian WorkCover Authority (VWA) is the state government  
34  
35 occupational health and safety and workers' compensation authority. To be eligible  
36  
37 for workers' compensation benefits, the worker must be able to demonstrate a  
38  
39 causal link between the injury or disease and their work. Employers are responsible  
40  
41 for income replacement for the first 10 days away from work, beyond which the VWA  
42  
43 provides income replacement benefits. Reasonable healthcare and rehabilitation  
44  
45 benefits are also provided by the VWA. 85% to 90% of workers in the state have  
46  
47 their workers' compensation insurance provided by the VWA. Exceptions are federal  
48  
49 government employees, sole traders and employees of some large self-insured  
50  
51 employers.  
52  
53  
54

### 55 **Compensation database**

1  
2  
3 A de-identified workers' compensation administrative database for the period  
4 from 1986 was obtained from the VWA for the purpose of this study. The database  
5 contains information regarding the claimant, injury or disease, and benefits paid in  
6 relation to the claim. Records include information on the claimant and benefits paid.  
7  
8 The Australian Standard Type of Occurrence Classification System (TOOCS v3)<sup>18</sup>  
9 was used to code the nature/mechanism of affliction. Occupation data were coded  
10 using Australian and New Zealand Standard Classification of Occupation  
11 (ANZSCO)<sup>19</sup>. The Australian New Zealand Standard Industry Classification (ANZSIC  
12 2006) was used to code industry data<sup>20</sup>. A detailed description of the compensation  
13 database can be found elsewhere<sup>11</sup>.

## 24 25 26 Data analysis

27  
28 All accepted workers' compensation claims occurring between 1 January  
29 1995 and 31 December 2008 were included in this study. Descriptive statistics were  
30 used to provide an overview of initial (first claim of a worker) and recurrent claims by  
31 gender, age, nature of affliction (injury or disease) and type of benefits paid (income  
32 replacement and medical expenses). A recurrent claim in this study was defined as a  
33 second or any subsequent claim of a worker during the study period, and it could  
34 have occurred for the same as initial or a completely different reason. Two outcomes  
35 were considered in this study: the rates of initial and recurrent injury and disease  
36 over the 14 year period; and the number of compensated days away from work  
37 (extracted from the database), which was used as the indicator of 'work disability'<sup>21</sup>.

38  
39  
40  
41  
42  
43  
44  
45  
46  
47  
48  
49  
50  
51 The incidence of initial and recurrent claims per annum was calculated as a  
52 rate per 1,000 workers, for males and females. Denominator data was drawn from  
53 the Australian Bureau of Statistics (ABS) labour force survey for the state of Victoria  
54  
55  
56  
57  
58  
59  
60

(www.abs.gov.au). A fully adjusted for age and gender Poisson count regression model was used to determine annual changes in rates between initial and recurrent injury and disease. SPSS version 20.0 was used for all analyses.

## RESULTS

### Initial and recurrent workplace injury and disease

Over the study period of 14 years a total of 448,868 workers lodged compensation claims for 972,281 discrete occurrences of work-related injury or disease (Table 1). Recurrent injury and disease accounted for 53.4% of all claims. These were attributable to only 26.2% of all claimants.

Males were more likely to have a recurrent injury or disease than females. A majority of claims were for occupational injuries. The vast majority of claimants were 25-44 years old; however the incidence rates of the initial and recurrent injuries or diseases were highest in the youngest workers, 15-19 years of age.

Occupational diseases were more likely to result in subsequent workers' compensation claims (24.2% vs. 28.2%). The majority of claims were lodged for income replacement and/or medical expenses.

[Insert Table 1 here]

### Incidence of initial and recurrent workplace injury and disease

The rates of initial and recurrent workplace injury and disease per 1,000 working population are displayed in Figure 1. Figure 1A illustrates incidence per annum of initial and recurrent claims per 1,000 working population. The rates of initial injury reduced from 26.4/1,000 in 1995 to 12.7/1,000 in 2008 (or by 6.1% per annum,  $p < 0.0001$ , 95% CIs -6.3 to -5.8). The rates of recurrent injury decreased

1  
2  
3 from 24.9/1,000 in 1995 to 14.5/1,000 in 2008 (or by 3.5% per annum,  $p < 0.0001$ ,  
4  
5 95% CIs -3.7 to -3).  
6  
7

8 Figure 1B illustrates annual incidence rates per 1,000 working population of  
9  
10 initial and recurrent injury and disease, in males and females separately. The rates  
11  
12 of initial injury and disease in males decreased by 6.7% ( $p < 0.0001$ , 95% CIs -7.4 to -  
13  
14 5.9) than in females. However, the rates of the recurrent injury and disease in males  
15  
16 every year increased by 3.0%, ( $p < 0.0001$ , 95% CIs 2.4 to 3.7) when compared to  
17  
18 females. The incidence rates of recurrent injuries and diseases were higher than in  
19  
20 the initial claims by 4.5% ( $p < 0.0001$ , 95% CIs 3.9 to 5.3) in males, and by 7.4%,  
21  
22 ( $p < 0.0001$ , 95% CIs 5.0 to 9.8) in females.  
23  
24

25  
26 [Insert Figure 1 here]  
27  
28

### 29 **Work disability**

30  
31 Table 2A summarizes work disability associated with the initial and recurrent  
32  
33 injury and disease. In total, over the study period of 14 years, workplace injury and  
34  
35 disease resulted in 188,978 years of full-time work loss. More than half (55.3%) of  
36  
37 this burden was caused by recurrent injury and disease.  
38  
39

40  
41 Males incurred 45,570 (38.7%) years of full time work loss due to the initial  
42  
43 injury, and 72,211 (61.3%) years - due to the recurrent injury and disease. Females  
44  
45 incurred 38,130 (54.8%) years of full time work loss during their initial claims. This  
46  
47 amount of time decreased to 31,404 (45.2%) years in recurrent injury and disease.  
48  
49 Occupational injuries accounted for 53,713 (44.8%) years of work disability in all  
50  
51 initial claims and 66,026 (55.2%) in recurrent injury. Work disability incurred for a  
52  
53 recurrent disease, relatively to the initial claims, was similar: 38,530 (55.6%) and  
54  
55 30,709 (44.4%) years of full time work loss respectively. **Workers in the 45-54 years**  
56  
57  
58  
59  
60

1  
2  
3 of age category incurred the highest amount of work loss– 24,973 years in initial and  
4  
5 36,493 years in recurrent injuries and diseases.  
6  
7

8 The average duration of time lost due to workplace injury and disease (Table  
9  
10 2B) was 85.6 (257.1) days; however it was higher for recurrent claims (93.4(276.5)  
11  
12 days). The average duration of time lost varied greatly across the age categories of  
13  
14 injured workers and it increased with workers' age.  
15  
16

17 [Insert Table 2 here]  
18  
19

## 20 DISCUSSION

### 21 Principal findings

22  
23  
24  
25 This large-scale administrative data study, designed to provide a population-  
26  
27 based overview of workers' compensation claims, showed that a recurrent workplace  
28  
29 injury and disease is frequent and associated with a substantial work disability. We  
30  
31 established that over the 14 year study period, 448,868 workers in the state of  
32  
33 Victoria, Australia, lodged 972,281 compensation claims, 53.4 % of them were filed  
34  
35 for a recurrent injury or disease (Table 1). The incidence rates were highest in the  
36  
37 youngest workers, possibly due to the denominator accounting for the full-time  
38  
39 employees. Younger workers usually choose temporary or part-time employment,  
40  
41 they are less experienced and are less aware of hazardous working conditions;  
42  
43 therefore are at a higher risk of occupational injuries<sup>22</sup>. Different patterns for men  
44  
45 and women for recurrent injuries and diseases (Figure 1B) are associated with the  
46  
47 lower number of women returning to work after the initial injury, which might occur to  
48  
49 the mental stress, depressive symptoms and vulnerability at work<sup>23</sup>. In agreement  
50  
51 with the previously reported findings we observed that rates of work-related injury  
52  
53 and disease were declining, which is probably associated with legislative changes,  
54  
55  
56  
57  
58  
59  
60

1  
2  
3 unemployment rates or seasonal affects, and, most importantly, with better  
4 strategies and increased effectiveness of injury prevention<sup>14 15 24 25</sup>.

5  
6  
7  
8 **In both initial and recurrent injuries/diseases the work disability increased with**  
9  
10 **claimants' age, which possibly was related to claimants' comorbidities, changes in**  
11 **physical and mental capacity or attitudes to return to work<sup>26 27</sup>.** In addition, we found  
12 that the majority (104,556 years) of time lost from work was from the recurrent claims  
13 (Table 2A). This is equivalent to ~10.4 days for each working person in Victoria.  
14  
15 Despite that sickness absence as a proportion of working time is decreasing, these  
16 figures are still substantial and represent a significant cost to the economy<sup>28</sup>.

### 23 24 **Strengths and weaknesses of the study**

25  
26  
27 The first strength of this study is the large and exclusive compensation  
28 research data source, containing detailed and objective information on workers, their  
29 injuries and diseases. Entries of the dataset are unique and no duplicate information  
30 is recorded. The second and principal strength is that, to our knowledge, this is the  
31 first study to summarize the overall impact of work disability and annual trends of  
32 subsequent work-related injury and disease, as most of the past studies treated  
33 claims as single and discrete events<sup>14 15 29-31</sup>. Earlier published scientific papers  
34 focused on the first return-to-work and time lost on temporary disability benefits as  
35 outcomes of the workplace related injury. These studies concluded that work-related  
36 injury and illness affects not only injured workers, but also employers, society and  
37 government<sup>7 29 32-37</sup>. Alternatively, only a few recent studies emphasized the burden  
38 of subsequent workers' compensation claims; however these studies analysed only  
39 the initial and second claims, but did not consider any further work-related injuries or  
40 illnesses<sup>10-12 38</sup>. Lack of understanding of the overall impact of a recurrent workplace  
41  
42  
43  
44  
45  
46  
47  
48  
49  
50  
51  
52  
53  
54  
55  
56  
57  
58  
59  
60

1  
2  
3 injury and disease instigates a significant dilemma associated with employment rates  
4 and earnings of injured workers, adverse effects on productivity and costs, including  
5 those associated with compensation<sup>9 33 39</sup>.  
6  
7  
8

9  
10 The first weakness of this study is that it is Victoria only specific study, and the  
11 database does not cover the entire population, certain injuries maybe underreported  
12 and, therefore results published here maybe underrepresented. i.e. workers may not  
13 claim for mental health related issues, they possibly have claimed in other  
14 institutions in the past or they are self-covered<sup>40 41</sup>. Secondly, we do not have  
15 information on claimants return to work as these dates are not recorded consistently  
16 by the compensation authority, particularly for periods before the year 2004/5. The  
17 reliability of this data is improving as the VWA gains more experience with collecting  
18 return to work outcomes. It is difficult to estimate the magnitude of these impacts  
19 without undertaking a comprehensive data linkage between jurisdictional workers'  
20 compensation and health datasets<sup>11 42</sup>. Thirdly, administrative data collection errors  
21 might have also occurred, which could have affected the nature and dates of  
22 subsequent injuries or diseases. In addition, legislative changes and organizational  
23 policies might have affected claim rates reported here<sup>43</sup>. It is also important to  
24 acknowledge that the present study does not report trends in claim costs or cost  
25 effectiveness analysis over the years; however it is already known that repeat  
26 workers' compensation claims are associated with increased costs of medical and  
27 like services and weekly compensation paid<sup>11</sup>.  
28  
29  
30  
31  
32  
33  
34  
35  
36  
37  
38  
39  
40  
41  
42  
43  
44  
45  
46  
47  
48  
49

## 50 **Conclusions and policy implications**

51  
52  
53 The most effective strategy for preventing work-related disability is a primary  
54 prevention approach, that is, preventing the initial work related injury and disease<sup>44</sup>.  
55  
56  
57  
58  
59  
60

1  
2  
3 Findings of the current study highlight a steady decline in the number of initial work-  
4 related injury and disease (Figure 1), indicating that primary injury prevention  
5 strategies at workplace are becoming more and more efficient over the years<sup>14</sup>. An  
6 accelerating reduction of recurrent injuries and diseases suggests that secondary  
7 prevention initiatives were possibly reviewed and addressed more carefully after  
8 1999. Despite the current return-to-work efforts and decreasing rates of the initial  
9 and recurrent injury and disease, there is probably still more room for improvement.  
10 Current injury prevention policies and procedures need to be regularly revised,  
11 focussing on more efficient secondary prevention<sup>45-47</sup>. A key to a successful  
12 secondary prevention is not only appropriately trained staff, but also clearly identified  
13 risk factors at workplace and a combination of early predictors for poor long-term  
14 outcomes in workers<sup>16 17</sup>. Both the injured worker and their employer are known to  
15 the compensation authorities, and therefore can be targeted by OH&S regulators  
16 and policy makers. It is essential to consider other factors such as precarious  
17 working conditions, worker's age, gender and comorbidities<sup>48-50</sup>. The type of a  
18 recurrent injury and disease is also known to the compensation authorities; therefore  
19 if a subsequent claim was lodged a long after the initial claim, or under completely  
20 different circumstances, alternative prevention measures should be considered.

21  
22  
23  
24  
25  
26  
27  
28  
29  
30  
31  
32  
33  
34  
35  
36  
37  
38  
39  
40  
41  
42  
43  
44  
45  
46  
47  
48  
49  
50  
51  
52  
53  
54  
55  
56  
57  
58  
59  
60

Secondary prevention examples may include activities that promote lifestyle changes and aim at improving the overall health of injured workers, restructuring the current workplace where the injury occurs, providing suitably modified work for injured workers, recommending them regular exams and screening tests or surveillance systems<sup>5 51</sup>. Return-to-work coordinators, clinicians and care management support also play an important role in workers' return-to-work and re-injury prevention. Their efforts may need to be revisited with incentives provided so



1  
2  
3 reduced costs for workers' compensation healthcare and increased safety practises  
4  
5 are implemented<sup>39</sup>. Education of workers to be more aware of hazards associated  
6  
7 with their job may be an important step forward. Introducing work wellness and  
8  
9 rehabilitation programs, providing counselling and job training for returning-to-work  
10  
11 staff members may also assist in a further reduction of re-injury<sup>2 39 51 52</sup>.  
12  
13

14  
15  
16 **Acknowledgements** The authors thank Susan Tinsley and Catherine Smith for their  
17  
18 support during the development of this paper.  
19

20  
21 **Contributors** Both authors equally participated in the study design and coordination.  
22  
23 Both authors read and approved the final manuscript.  
24

25  
26 **Funding** This research and the involvement of Dr Ruseckaite and Dr Collie in the  
27  
28 study was provided by a research grant from WorkSafe Victoria.  
29

30  
31 **Competing interests** None.  
32

33  
34 **Ethics approval** Monash University Human Research Ethics Committee,  
35  
36 Melbourne, Australia.

37  
38 **Provenance and peer review** Not commissioned; externally peer reviewed.  
39  
40  
41  
42  
43  
44  
45  
46  
47  
48  
49  
50  
51  
52  
53  
54  
55  
56  
57  
58  
59  
60

## REFERENCES

1. Wadell G, Burton A. Is work good for your health and well-being? *Department for Work and Pensions* 2006.
2. Pransky G, Loisel P, Anema J. Work disability prevention research: current and future prospects. *J Occup Rehabil* 2011;21:287-292.
3. Anema J, Schellart A, Cassidy J *et al*. Can cross country differences in return-to-work after chronic occupational back pain be explained? An explanatory analysis on disability policies in a six country cohort study. *J Occup Rehabil* 2009;19:419-426.
4. Campolieti M. Multiple state hazard models and workers' compensation claims: an examination of workers compensation data from Ontario. *Acc Anal Prev* 2000;33:197-202.
5. Garcy P, Mayer T, Gatchel R. Recurrent or new injury outcomes after return to work in chronic disabling spinal disorders: tertiary prevention efficacy and functional restoration treatment. *Spine* 1996;21:952-959.
6. Shuford H, Restrepo T, Beaven B *et al*. Trends in components of medical spending within workers compensation: results from 37 states combined. *J Occup Environ Med* 2009;51.
7. Smith P, Chen C, Hogg-Johnson S *et al*. Trends in the health care use in expenditures associated with no-lost-time claims in Ontario: 1991 to 2006. *JOEM* 2011;53:211-217.
8. Carlos-Rivera F, Aguilar-Madrid G, Gómez-Montenegro P *et al*. Estimation of health-care costs for work-related injuries in the Mexican Institute of Social Security. *Am J Ind Med* 2009;52:195-201.
9. Utterback D, Schnorr T, Silverstein B *et al*. Occupational health and safety surveillance and research using workers' compensation data. *JOEM* 2012;00:1-5.
10. Cherry N, Sithole F, Beach J *et al*. Second WCB claims: who is at risk? *Can J Public Health* 2010;101.
11. Ruseckaite R, Collie A. Repeat workers' compensation claims: risk factors, costs and work disability. *BMC Public Health* 2011;11:492.
12. Bena A, Mamo C, Marinacci C *et al*. Risk of repeat accidents by economic activity in Italy. *Safety Sc* 2006;44:297-312.
13. Yassi A, Gilbert M, Cvitkovich Y. Trends in injuries, illnesses, and policies in Canadian healthcare workplaces. *Can J Public Health* 2005;96:333-339.

- 1
- 2
- 3 14. Breslin F, Smith P, Moore I. Examining the decline in lost-time claim rates
- 4 across age groups in Ontario between 1991 and 2007. *Occup Environ Med*
- 5 2011;68:813-817.
- 6
- 7 15. Moore I, Tompa E. Understanding changes over time in workers'
- 8 compensation claim rates using time series analytical techniques *Occup*
- 9 *Environ Med* 2011;68:837-841.
- 10
- 11 16. Arocena P, Nunez P, Villanueva M. The impact of prevention measures and
- 12 organizational factors on occupational injuries. *Safety Science* 2008;46:1369-
- 13 1384.
- 14
- 15 17. Guzman J, Yassi A, Baril R *et al*. Decreasing occupational injury and
- 16 disability: the convergence of systems theory, knowledge transfer and action
- 17 research. *Work* 2008;30:229-239.
- 18
- 19 18. Government Australialia. *Type of occurence classification system, 3rd edition*
- 20 *(revision 1)*, Canberra: Australian Safety and Compensation Council 2008.
- 21
- 22 19. ANZSCO - *Australian and New Zealand Standard Classification of*
- 23 *Occupations*. In: Statistics ABo (ed.), Canberra 2006.
- 24
- 25 20. *Australian and New Zealand Standad Industrial Classification (ANZSIC)*. In:
- 26 Zealand. ABoSaSN (ed.), Canberra 2006.
- 27
- 28 21. Berecki-Gisolf J, Clay F, Collie A *et al*. Predictors of sustained return to work
- 29 after work-related injury or disease:insights from workers' compensation
- 30 claims records. *J Occup Rehabil* 2011;22:283-291.
- 31
- 32 22. Virtanen M, Kivimaki M, Joensuu M *et al*. Temporary employment and health:
- 33 review. *Int J Epidemiol* 2005;34:610-622.
- 34
- 35 23. Koopmans P, Bultmann U, Roelen C *et al*. Recurrence of sickness absence
- 36 due to common mental disorders. *Int Arch Occup Environ Health*
- 37 2011;84:193-201.
- 38
- 39 24. Gatty C, Turner M, Buitendorp D *et al*. The effectiveness of back pain and
- 40 injury prevention programs in the workplace *Work* 2003;20:275-266.
- 41
- 42 25. Foley M, Fan Z, Rauser E *et al*. The impact of regulatory enforcement and
- 43 consultation visits on workers' compensation claims incidence rates and
- 44 costs, 1999-2008. *Am J Ind Med* 2012;55:976-990.
- 45
- 46 26. Ilmarinen J. Aging workers. *Occup Environ Med* 2001;58:546-552.
- 47
- 48 27. Kenny G, Yardley J, Martineau L *et al*. Physical work capacity in older adults:
- 49 implications for the aging workers. *Am J Ind Med* 2008;51:610-625.
- 50
- 51 28. Black C. *Working for a healthier tomorrow*, London 2008.
- 52
- 53
- 54
- 55
- 56
- 57
- 58
- 59
- 60

- 1
- 2
- 3 29. Berecki-Gisolf J, Clay F, Collie A *et al*. The impact of ageing on work disability
- 4 and return to work: insights from workers' compensation claim records *JOEM*
- 5 2012;54:318-327.
- 6
- 7 30. Johnson D, Fry T. *Factors affecting return to work after injury: a study for the*
- 8 *Victorian WorkCover authority Melbourne Institute Working Paper No. 28/02*
- 9 *2002.*
- 10
- 11 31. Smith P, Hogg-Johnson S, Mustard C *et al*. Comparing the risk factors
- 12 associated with serious versus and less serious work-related injuries in
- 13 Ontario between 1991 and 2006. *Am J Ind Med* 2012;55:84-92.
- 14
- 15 32. Boden L, Biddle E, Spieler E. Social and economic impacts of workplace
- 16 illness and injury: current and future directions for research. *Am J Ind Med*
- 17 2001;40:398-342.
- 18
- 19 33. Boden L, Galizz M. Economic consequences of workplace injuries and
- 20 illnesses: lost earnings and benefit adequacy. *Am J Ind Med* 1999;36:487-
- 21 503.
- 22
- 23 34. John F, Kerr M, Brooker A *et al*. Disability resulting from occupational low
- 24 back pain: part II: what do we know about secondary prevention? A review of
- 25 the scientific evidence on prevention after disability begins. *Spine*
- 26 1996;21:2918-2929.
- 27
- 28 35. Leigh J, Markowitz S, Fahs M *et al*. Occupational illness and injury in the
- 29 United States: estimates of costs, morbidity, and mortality. *Arch Intern Med*
- 30 1997;157:1557-1568.
- 31
- 32 36. Miller T, Galbraith M. The costs of occupational injury in the United States.
- 33 *Accid Anal & Prevention* 1995;27:741-747.
- 34
- 35 37. Reville R, Bhattacharya J, Sager L. Measuring the economic consequences of
- 36 workplace injuries. *Am J Ind Med* 2001;40:452-463
- 37
- 38 38. Wasiak R, Pransky G, Webster B. Methodological challenges in studying
- 39 recurrence of low back pain. *J Occup Rehabil* 2003;13:21-31.
- 40
- 41 39. Wickizer T, Franklin G, Fulton-Kehoe D *et al*. Improving quality, preventing
- 42 disability and reducing costs in workers' compensation healthcare. *Med Care*
- 43 2011;49:1105-1111.
- 44
- 45 40. Collie A, Pan Y, Britt H *et al*. Coverage of work-related injuries by workers'
- 46 compensation in Australian general practice. *Int J Work Comp* 2011;3:1-10.
- 47
- 48 41. Driscoll T, Mitchell R, Mandryk J *et al*. Coverage of work related fatalities in
- 49 Australia by compensation and occupational health and safety agencies.
- 50 *Occup Environ Med* 2003;60:195-200.
- 51
- 52
- 53
- 54
- 55
- 56
- 57
- 58
- 59
- 60

- 1  
2  
3 42. Ruseckaite R, Clay F, Collie A. Second workers' compensation claims: Who is  
4 at risk? Analysis of WorkSafe Victoria, Australia compensation claims. *Can J*  
5 *Public Health* 2012;103:309-313.  
6  
7 43. Cameron I, Rebbeck T, Sindhusake D. Legislative change is associated with  
8 improved health status in people with whiplash. *Soine* 2008;33:250-254.  
9  
10 44. Feldstein A, Breen V, Dana N. Prevention of work-related disability. *J Prev*  
11 *Med* 1998;14:33-39.  
12  
13 45. Association APH. *Worker's compensation reform 2009*.  
14  
15 46. Ammendolia C, Cassidy D, Soklaridis S *et al*. Designing a workplace return-  
16 to-work program for occupational low back pain: an intervention mapping  
17 approach. *BMC Musculoskeletal Disorders* 2009;10:doi:10.1186/1471-2474-  
18 10-65.  
19  
20 47. Sullivan M, Ward L, Tripp D *et al*. Secondary prevention of work disability:  
21 community-based psychosocial intervention for musculoskeletal disorders. *J*  
22 *Occup Rehabil* 2005;15:377-392.  
23  
24 48. Quinlan M, Mayhew C. Precarious employment and workers' compensation.  
25 *Int J Law Psych* 1999;22:491-520.  
26  
27 49. Restrepo T, Shuford H. *Workers compensation and the aging workforce*. In:  
28 Brief NR (ed.) 2011.  
29  
30 50. Smith C, Silverstein B, Bonauto D *et al*. Temporary workers in Washington  
31 state. *Am J Indust Med* 2010;53:135-145.  
32  
33 51. Feuerstein M. A multidisciplinary approach to the prevention, evaluation, and  
34 management of work disability. *J Occup Rehabil* 1991;1:5-12.  
35  
36 52. Sullivan M, Feuerstein M, Gatchel R *et al*. Integrating psychosocial and  
37 behavioural interventions to achieve optimal rehabilitation outcomes. *J Occup*  
38 *Rehabil* 2005;15:475-489.  
39  
40  
41  
42  
43  
44  
45  
46  
47  
48  
49  
50  
51  
52  
53  
54  
55  
56  
57  
58  
59  
60

Table 1. Profile of initial and recurrent workers' compensation claims by category in Victoria, 1995 to 2008.

| Category            | Initial claims |                     |          |          | Recurrent claims |                     |          |          | Total claims |                     |          |          | p     |       |
|---------------------|----------------|---------------------|----------|----------|------------------|---------------------|----------|----------|--------------|---------------------|----------|----------|-------|-------|
|                     | N              | Rate,<br>95%CI      | Row<br>% | Col<br>% | N                | Rate,<br>95%CI      | Row<br>% | Col<br>% | N            | Rate,<br>95%CI      | Row<br>% | Col<br>% | Row   | Col   |
| Total claims        | 448,868        | 19.1<br>[15.2-20.1] | 46.2     | -        | 523,413          | 22.3<br>[21.2-23.4] | 53.4     | -        | 972,281      | 41.5<br>[39.4-43.5] | 100      | -        | 0.000 | -     |
| Total claimants     | 448,868        | 19.1<br>[15.2-20.1] | 76.8     | -        | 135,349          | 5.8<br>[5.5-6.1]    | 26.2     | -        | 584,217      | 24.9<br>[23.7-26.2] | 100      | -        | 0.000 | -     |
| Claims per claimant | 1              | -                   | -        | -        | 3.86             | -                   | -        | -        | 1.66         | -                   | -        | -        | -     | -     |
| Gender*             |                |                     |          |          |                  |                     |          |          |              |                     |          |          |       |       |
| Males               | 274,915        | 17.7<br>[16.8-18.5] | 75.1     | 61.2     | 91,072           | 5.9<br>[5.6-6.1]    | 24.9     | 67.3     | 365,987      | 23.5<br>[22.3-24.7] | 100      | 62.6     | 0.000 | 0.000 |
| Females             | 163,059        | 20.7<br>[19.6-21.7] | 79.8     | 36.3     | 41,111           | 5.2<br>[5.0-5.5]    | 20.2     | 30.4     | 204,170      | 25.9<br>[24.6-27.2] | 100      | 34.9     | 0.000 | 0.000 |
| Missing             | 10,894         | 0.46<br>[0.44-0.49] | 77.5     | 2.4      | 3,166            | 0.13<br>[0.13-0.14] | 22.5     | 2.3      | 14,060       | 0.59<br>[0.57-0.63] | 100      | 2.5      | 0.003 | NS    |
| Age category*       |                |                     |          |          |                  |                     |          |          |              |                     |          |          |       |       |
| 15-19               | 33,393         | 54.3<br>[51.6-57.0] | 76.0     | 7.4      | 10,571           | 17.2<br>[16.3-18.0] | 24.0     | 7.8      | 43,964       | 71.5<br>[67.9-75.1] | 100      | 7.5      | 0.000 | NS    |
| 20-24               | 68,421         | 27.6<br>[26.2-29.0] | 76.6     | 15.2     | 20,858           | 8.4<br>[8.0-8.8]    | 23.4     | 15.4     | 89,279       | 36.0<br>[34.2-37.8] | 100      | 15.3     | 0.000 | NS    |
| 25-34               | 117,817        | 18.2<br>[17.3-19.1] | 76.5     | 26.2     | 36,132           | 5.6<br>[5.3-5.9]    | 23.5     | 26.7     | 153,949      | 23.8<br>[22.6-25.0] | 100      | 26.4     | 0.000 | NS    |
| 35-44               | 103,799        | 17.2<br>[16.4-18.1] | 75.3     | 23.1     | 33,963           | 5.6<br>[5.4-5.9]    | 24.7     | 25.1     | 137,762      | 22.9<br>[21.7-24.0] | 100      | 23.6     | 0.000 | 0.000 |
| 45-54               | 87,619         | 16.5<br>[15.7-17.3] | 77.1     | 19.5     | 26,057           | 4.9<br>[4.7-5.2]    | 22.9     | 19.3     | 113,676      | 21.4<br>[20.3-22.5] | 100      | 19.5     | 0.000 | NS    |
| 55-59               | 24,086         | 15.4<br>[14.6-16.2] | 81.0     | 5.4      | 5,667            | 3.6<br>[3.4-3.8]    | 19.0     | 4.2      | 29,753       | 19.0<br>[18.1-20.0] | 100      | 5.1      | 0.000 | 0.000 |
| 60-64               | 10,828         | 14.8<br>[14.1-15.6] | 85.6     | 2.4      | 1,817            | 2.5<br>[2.4-2.6]    | 14.4     | 1.3      | 12,645       | 17.3<br>[16.5-18.2] | 100      | 2.2      | 0.000 | 0.003 |
| 65+                 | 2,905          | 10.4<br>[9.9-11.0]  | 91.1     | 0.6      | 284              | 1.0<br>[1.0-1.1]    | 8.9      | 0.2      | 3,189        | 11.5<br>[10.9-12.0] | 100      | 0.5      | 0.000 | NS    |

1  
2  
3  
4  
5  
6  
7  
8  
9  
10  
11  
12  
13  
14  
15  
16  
17  
18  
19  
20  
21  
22  
23  
24  
25  
26  
27  
28  
29  
30  
31  
32  
33  
34  
35  
36  
37  
38  
39  
40  
41  
42  
43  
44  
45  
46  
47  
48  
49

| Nature of affliction                     |         |             |      |      |         |             |      |      |         |             |     |      |       |       |  |
|------------------------------------------|---------|-------------|------|------|---------|-------------|------|------|---------|-------------|-----|------|-------|-------|--|
| Injury                                   | 340,203 | 14.5        | 47.4 | 75.8 | 376,033 | 16.0        | 52.6 | 71.8 | 716,236 | 30.5        | 100 | 73.6 | 0.000 | 0.000 |  |
|                                          |         | [13.8-15.2] |      |      |         | [15.2-16.8] |      |      |         | [29.0-32.1] |     |      |       |       |  |
| Disease                                  | 108,665 | 4.6         | 42.4 | 24.2 | 147,380 | 6.3         | 57.6 | 28.2 | 256,045 | 10.9        | 100 | 26.4 | 0.000 | 0.000 |  |
|                                          |         | [4.4-4.9]   |      |      |         | [6.0-6.6]   |      |      |         | [10.4-11.5] |     |      |       |       |  |
| Compensation benefits paid               |         |             |      |      |         |             |      |      |         |             |     |      |       |       |  |
| Income replacement +/- medical expenses^ | 257,082 | 11.0        | 46.8 | 57.3 | 292,340 | 12.5        | 53.2 | 55.8 | 549,422 | 23.4        | 100 | 56.5 | 0.000 | 0.000 |  |
|                                          |         | [10.4-11.5] |      |      |         | [11.8-13.1] |      |      |         | [22.3-24.6] |     |      |       |       |  |
| Medical expenses only                    | 191,786 | 8.2         | 45.4 | 42.7 | 231,073 | 9.9         | 54.6 | 44.2 | 422,859 | 18.0        | 100 | 43.5 | 0.000 | 0.000 |  |
|                                          |         | [7.8-8.6]   |      |      |         | [9.4-10.3]  |      |      |         | [17.1-18.9] |     |      |       |       |  |

\* The rates are presented for claimants, not claims

^ "Income replacement +/- medical expenses" group represents these claimants, who had time off work and/or required compensation for medical expenses

For peer review only

Table 2A. A total work disability arising from initial and recurrent workers compensation claims in Victoria, 1995 to 2008.

| Category                 | Initial claims |       |       | Recurrent claims |       |       | Total claims |       |       | p     |       |
|--------------------------|----------------|-------|-------|------------------|-------|-------|--------------|-------|-------|-------|-------|
|                          | N              | Row % | Col % | N                | Row % | Col % | N            | Row % | Col % | Row   | Col   |
| <b>Work- loss, years</b> |                |       |       |                  |       |       |              |       |       |       |       |
| All time-loss claims     | 84,422         | 44.7  | -     | 104,556          | 55.3  | -     | 188,978      | 100   | -     | 0.000 | -     |
| Males                    | 45,570         | 38.7  | 53.4  | 72,211           | 61.3  | 69.1  | 117,781      | 100   | 62.3  | 0.000 | 0.000 |
| Females                  | 38,130         | 54.8  | 45.2  | 31,404           | 45.2  | 30.1  | 69,534       | 100   | 36.8  | 0.000 | 0.000 |
| Injury                   | 53,713         | 44.8  | 63.6  | 66,026           | 55.2  | 63.1  | 119,739      | 100   | 63.4  | 0.000 | 0.000 |
| Disease                  | 30,709         | 44.4  | 36.4  | 38,530           | 55.6  | 36.9  | 69,239       | 100   | 36.6  | 0.000 | NS    |
| <b>Age category</b>      |                |       |       |                  |       |       |              |       |       |       |       |
| 15-19                    | 2,170          | 84.6  | 2.6   | 396              | 15.4  | 0.4   | 2,566        | 100   | 1.4   | 0.000 | 0.007 |
| 20-24                    | 6,050          | 66.8  | 7.2   | 3,010            | 33.2  | 2.9   | 9,060        | 100   | 4.8   | 0.000 | 0.000 |
| 25-34                    | 17,350         | 50.5  | 20.6  | 16,980           | 49.5  | 16.2  | 34,330       | 100   | 18.2  | NS    | 0.000 |
| 35-44                    | 23,606         | 44.0  | 28.0  | 30,012           | 56.0  | 28.7  | 53,618       | 100   | 28.4  | 0.000 | NS    |
| 45-54                    | 24,943         | 40.6  | 29.5  | 36,493           | 59.4  | 34.9  | 61,436       | 100   | 32.5  | 0.000 | 0.000 |
| 55-59                    | 7,426          | 37.0  | 8.8   | 12,650           | 63.0  | 12.1  | 20,076       | 100   | 10.6  | 0.000 | 0.000 |
| 60-64                    | 2,468          | 35.8  | 2.9   | 4,418            | 64.2  | 4.2   | 6,886        | 100   | 3.6   | 0.000 | 0.006 |



|     |     |      |     |     |      |     |       |     |     |       |       |
|-----|-----|------|-----|-----|------|-----|-------|-----|-----|-------|-------|
| 65+ | 408 | 40.6 | 2.6 | 597 | 59.4 | 0.6 | 1,005 | 100 | 0.5 | 0.000 | 0.008 |
|-----|-----|------|-----|-----|------|-----|-------|-----|-----|-------|-------|

Table 2B. An average and median work disability arising from initial and recurrent workers compensation claims in Victoria, 1995 to 2008.

| Category             | Initial claims  |                    | Recurrent claims |                    | Total claims    |                    | p     |
|----------------------|-----------------|--------------------|------------------|--------------------|-----------------|--------------------|-------|
|                      | Mean (SD), days | Median (IQR), days | Mean (SD), days  | Median (IQR), days | Mean (SD), days | Median (IQR), days | Row   |
| All time-loss claims | 85.6 (257.1)    | 10 (10-38)         | 93.4 (276.5)     | 10 (10-39)         | 89.8 (267.6)    | 10 (10-39)         | 0.000 |
| Males                | 76.2 (241.3)    | 10 (10-34)         | 86.4 (267.2)     | 10 (10-34)         | 82.2 (256.7)    | 10 (10-34)         | 0.000 |
| Females              | 102.9 (284.2)   | 10 (10-50)         | 118.5 (309.6)    | 10 (10-65)         | 109.4 (295.1)   | 10 (10-56)         | 0.000 |
| Injury               | 75.1 (244.0)    | 10 (10-30)         | 86.1 (275.9)     | 10 (10-30)         | 80.7 (261.2)    | 10 (10-30)         | 0.000 |
| Disease              | 113.9 (286.5)   | 14 9 (10-71)       | 109.3 (277.1)    | 11 (10-65)         | 111.3 (281.3)   | 13 (10-67)         | 0.000 |
| Age category         |                 |                    |                  |                    |                 |                    |       |
| 15-19                | 29.5 (91.6)     | 10 (10-16)         | 26.7 (91.6)      | 10 (10-10)         | 29.0 (91.6)     | 10 (10-15)         | NS    |
| 20-24                | 40.1 (123.7)    | 10 (10-21)         | 40.3 (135.7)     | 10 (10-15)         | 40.2 (127.8)    | 10 (10-20)         | NS    |
| 25-34                | 68.5 (207.6)    | 10 (10-31)         | 65.5 (205.9)     | 10 (10-26)         | 66.9 (206.7)    | 10 (10-29)         | NS    |
| 35-44                | 102.7 (286.6)   | 10 (10-48)         | 92.6 (275.6)     | 10 (10-39)         | 96.8 (280.3)    | 10 (10-42)         | 0.000 |
| 45-54                | 127.2 (349.8)   | 11 (10-63)         | 120.7 (340.6)    | 10 (10-55)         | 123.2 (344.3)   | 10 (10-58)         | 0.034 |
| 55-59                | 139.3 (336.9)   | 15 (10-70)         | 136.1 (337.2)    | 12 (10-67)         | 137.5 (337.1)   | 13 (10-68)         | NS    |

1  
2  
3  
4  
5  
6  
7  
8  
9  
10  
11  
12  
13  
14  
15  
16  
17  
18  
19  
20  
21  
22  
23  
24  
25  
26  
27  
28  
29  
30  
31  
32  
33  
34  
35  
36  
37  
38  
39  
40  
41  
42  
43  
44  
45  
46  
47  
48  
49

|       |               |               |               |            |               |            |    |
|-------|---------------|---------------|---------------|------------|---------------|------------|----|
| 60-64 | 106.9 (213.5) | 16 (10-72)    | 101.6 (204.7) | 15 (10-72) | 103.5 (207.8) | 16 (10-72) | NS |
| 65+   | 80.6 (122.5)  | 25 (10-85.75) | 76.8 (127.4)  | 20 (10-70) | 78.3 (125.5)  | 22 (10-77) | NS |

For peer review only

1  
2  
3  
4  
5  
6  
7  
8  
9  
10  
11  
12  
13  
14  
15  
16  
17  
18  
19  
20  
21  
22  
23  
24  
25  
26  
27  
28  
29  
30  
31  
32  
33  
34  
35  
36  
37  
38  
39  
40  
41  
42  
43  
44  
45  
46  
47  
48  
49  
50  
51  
52  
53  
54  
55  
56  
57  
58  
59  
60

Figure 1. Incidence of initial (1A) and recurrent (1B) workplace injury and disease per 1,000 workers in Victoria, 1995 to 2008

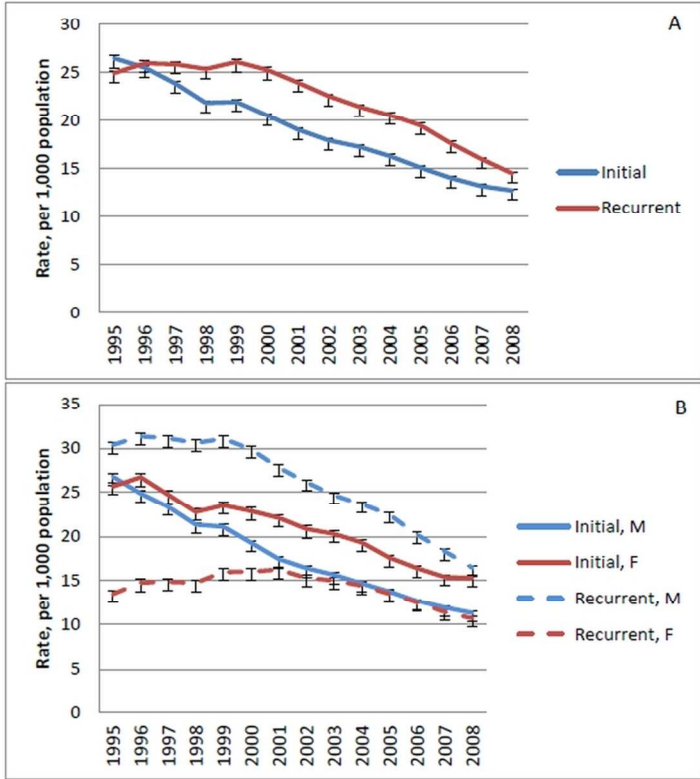

103x90mm (300 x 300 DPI)
